# Supplementary material for: Rhodium-catalyzed Z -alkenylation of gem -difluoropropenes: access to fluorinated (1 Z ,4 Z )-dienes
Source: Royal Society of Chemistry journal article supplement (doi:10.1039/d5ob01824b), 2026-01-01

## Electronic Supplementary Information

# Rhodium-Catalyzed Z-Alkenylation of *gem*- Difluoropropenes: Access to Fluorinated (1Z,4Z)-Dienes

Jiang-Min Yan, Kai-Xian Ma, Rui-Hong Chen, Xue-Mei Huang, Zi-Xin Ye, Qing-Hua

Li\* and Tang-Lin Liu\*

School of Chemistry and Chemical Engineering, Southwest University, Chongqing,  
400715, P. R. China.

E-mail: liuschop@swu.edu.cn; liqinghua@swu.edu.cn

## Table of contents

|                                    |          |
|------------------------------------|----------|
| <b>I General Information .....</b> | <b>2</b> |
| <b>II References .....</b>         | <b>3</b> |
| <b>III NMR spectra .....</b>       | <b>4</b> |

## I General Information

**$^1\text{H}$  NMR and  $^{13}\text{C}$  NMR** spectra were recorded on a Bruker Avance 600 MHz instruments. Chemical shifts were reported in parts per million (ppm), and the residual solvent peak was used as an internal reference: proton (chloroform  $\delta$  7.26), carbon (chloroform  $\delta$  77.16) or tetramethylsilane (TMS  $\delta$  0.00) was used as a reference. Multiplicity was indicated as follows: s (singlet), d (doublet), t (triplet), q (quartet), m (multiplet), dd (doublet of doublet), bs (broad singlet). Coupling constants were reported in Hertz (Hz). All high resolution mass spectra (HRMS) were obtained on a Bruker Apex-2. For thin layer chromatography (TLC), Qingdao Haiyang Chemical was used, and compounds were visualized with a UV light at 254 nm. Further visualization was achieved by staining with iodine, or potassium permanganate solution followed by heating using a heat gun. Flash chromatography separations were performed on Qingdao Haiyang Chemical 200-300 mesh silica gel. All reactions were carried out under a nitrogen atmosphere. All commercially available reagents were used as received for the reactions without any purification. All solvents were dried on alumina columns using a solvent dispensing system.

**Materials:**  $[\text{Rh}(\text{COD})_2]\text{BF}_4$  and LiO'Bu were obtained from commercial suppliers and used without further purification. All Solvents were purified by standard procedure before use. Allylic *gem*-Difluorides,<sup>1-2</sup> allylic alcohols<sup>3-4</sup> are synthesis via the known procedures.

## II References

- 1 Q.-Q. Min, Z. Yin, Z. Feng, W.-H. Guo and X. Zhang, *J. Am. Chem. Soc.* 2014, **136**, 1230-1233.
- 2 T. W Butcher, J. L. Yang, W. M. Amberg, N. B. Watkins, N. D. Wilkinson and J. F. Hartwig, *Nature* 2020, **583**, 548-553.
- 3 Loui, H. J.; Schneider, C., *Org. Lett.* 2022, **24**, 1496-1501.
- 4 X. Wen, X. Shi, X. Qiao, Z. Wu and G. Bai, *Chem. Commun.* 2017, **53**, 5372-5375.

### III NMR spectra

#### $^1\text{H}$ NMR (600 MHz, $\text{CDCl}_3$ )

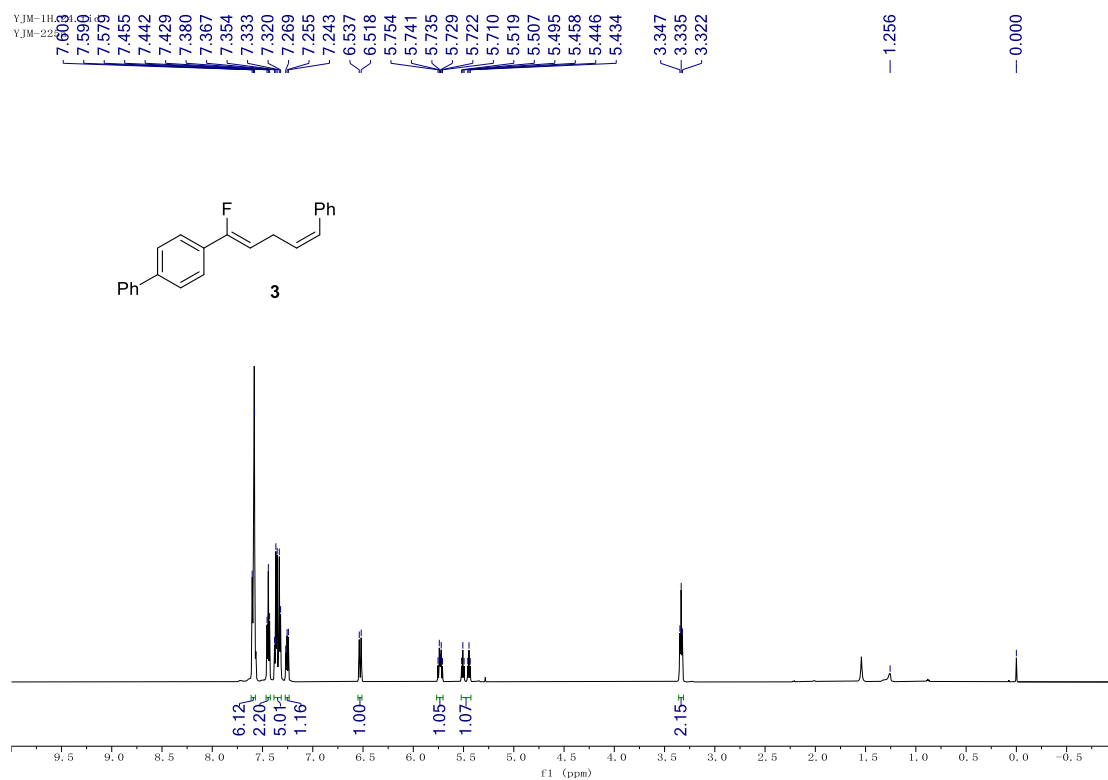

#### $^{13}\text{C}$ NMR (101 MHz, $\text{CDCl}_3$ )

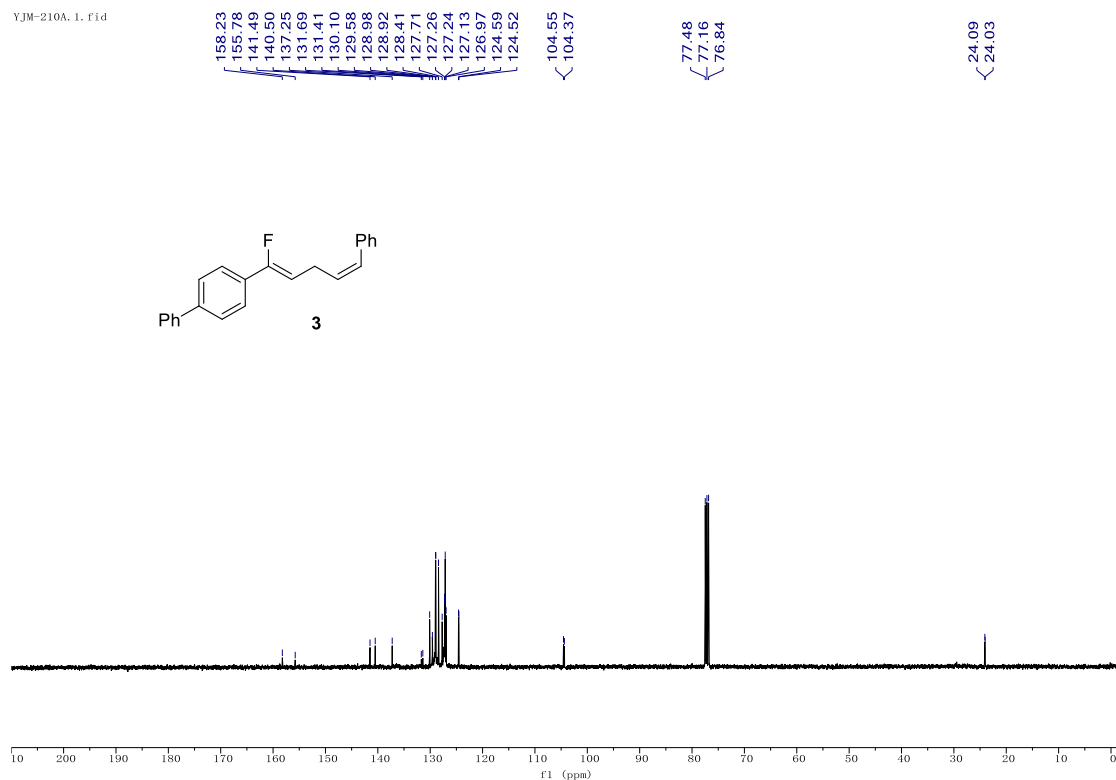

<sup>19</sup>F NMR (565 MHz, CDCl<sub>3</sub>)

YJM-19F\_2.fid  
YJM-225A

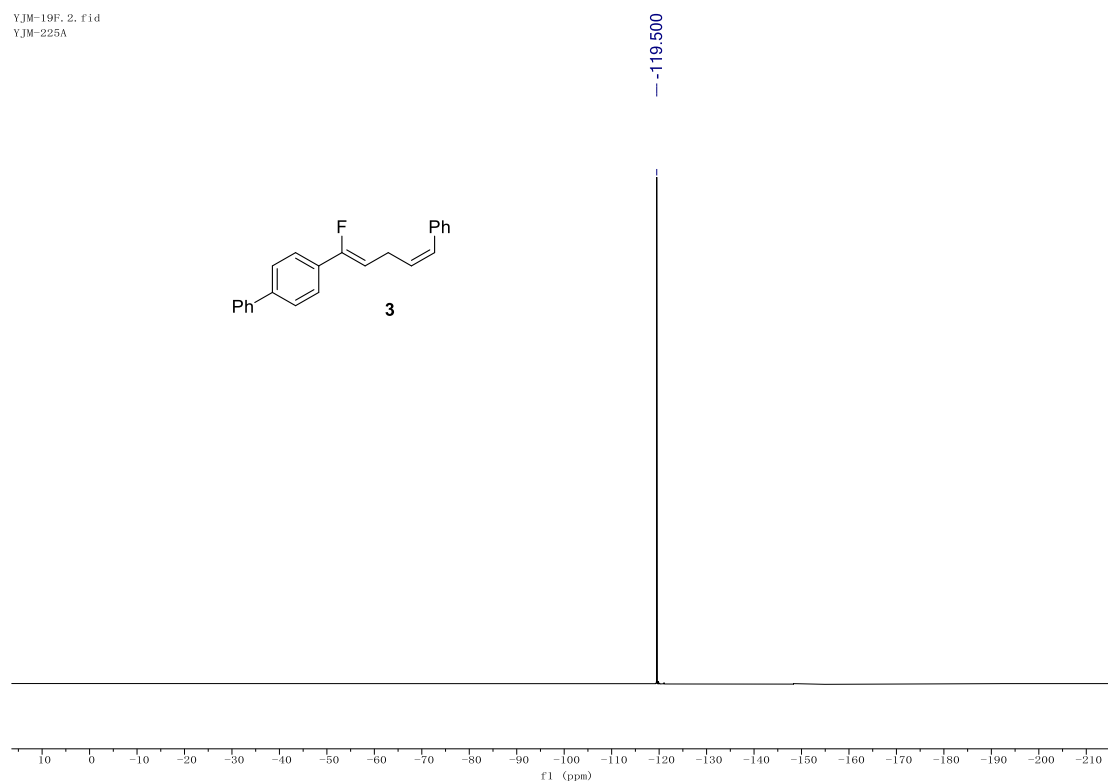

<sup>1</sup>H NMR (600 MHz, CDCl<sub>3</sub>)

氢谱/235A  
YJM-235A

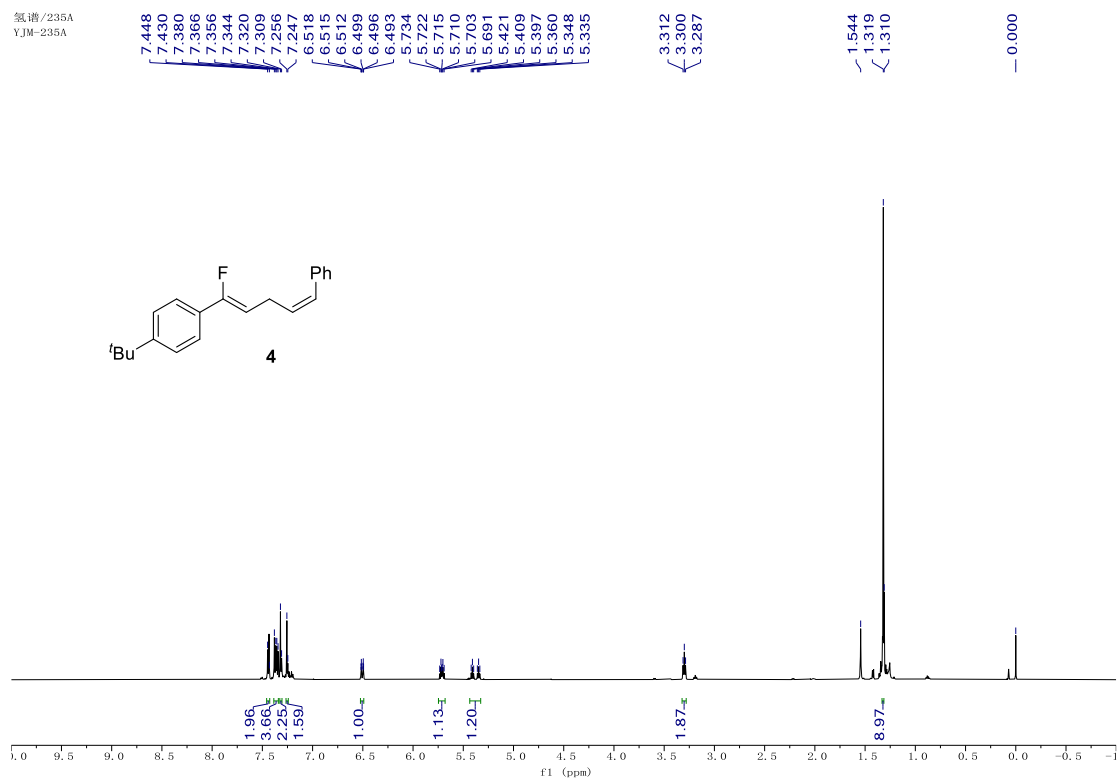

# <sup>13</sup>C NMR (151 MHz, CDCl<sub>3</sub>)

YJM-13C\_11.fid  
YJM-235A

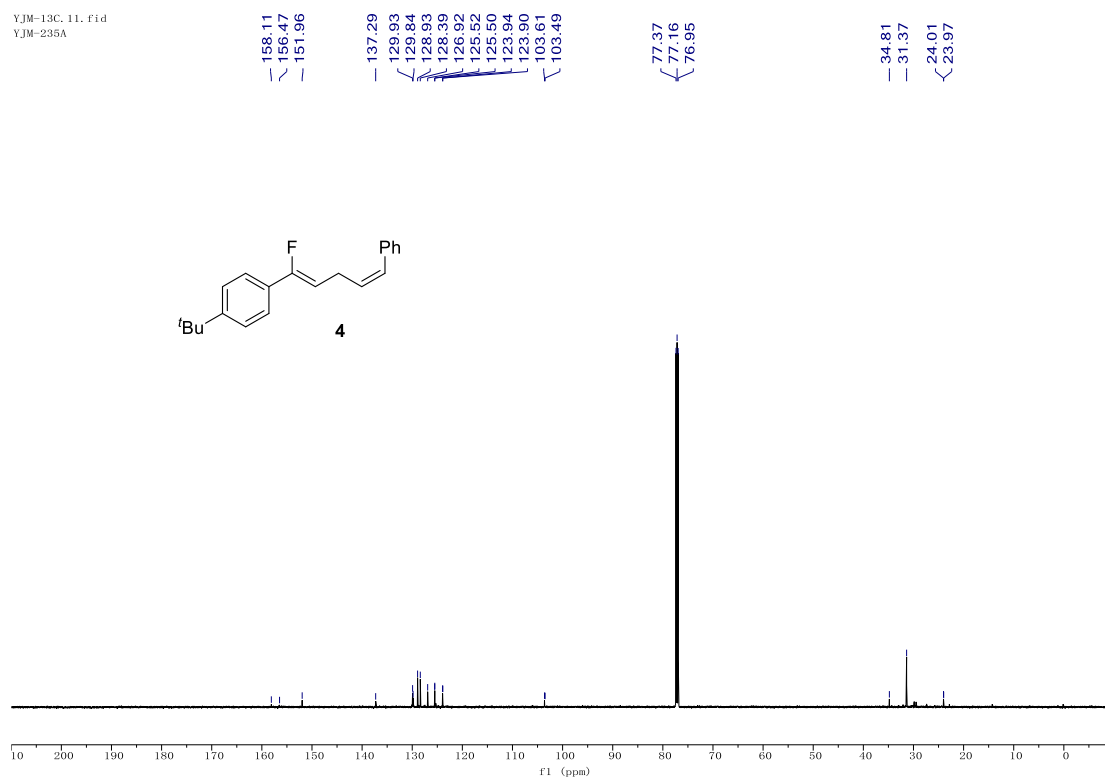

# <sup>19</sup>F NMR (565 MHz, CDCl<sub>3</sub>)

YJM-19F\_15.fid  
YJM-235A

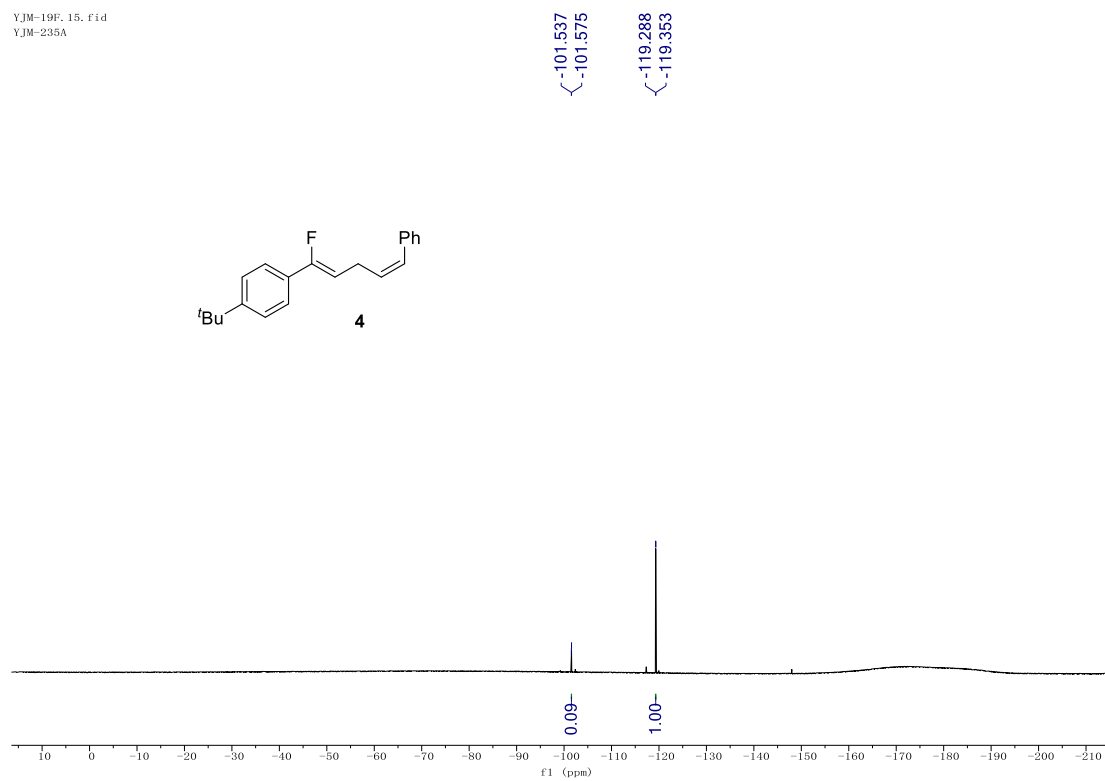

# <sup>1</sup>H NMR (600 MHz, CDCl<sub>3</sub>)

YJM-1H\_32.fid  
YJM-259E

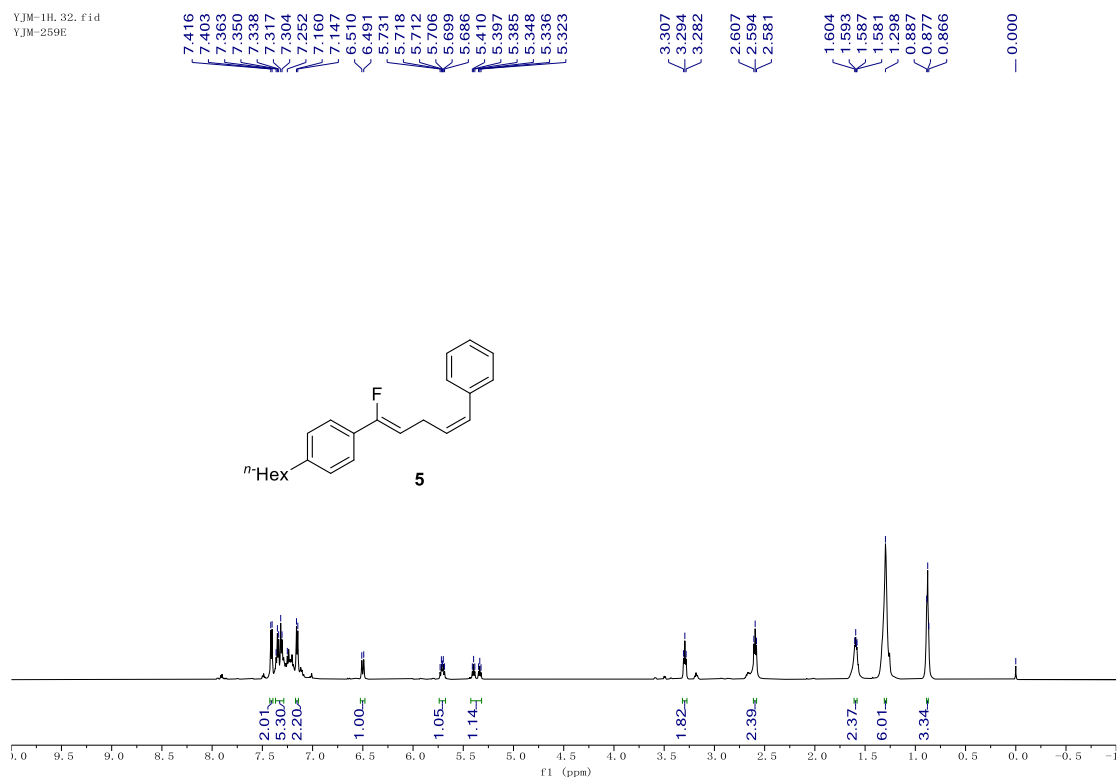

# <sup>13</sup>C NMR (151 MHz, CDCl<sub>3</sub>)

YJM-13C\_20.fid  
YJM-259E

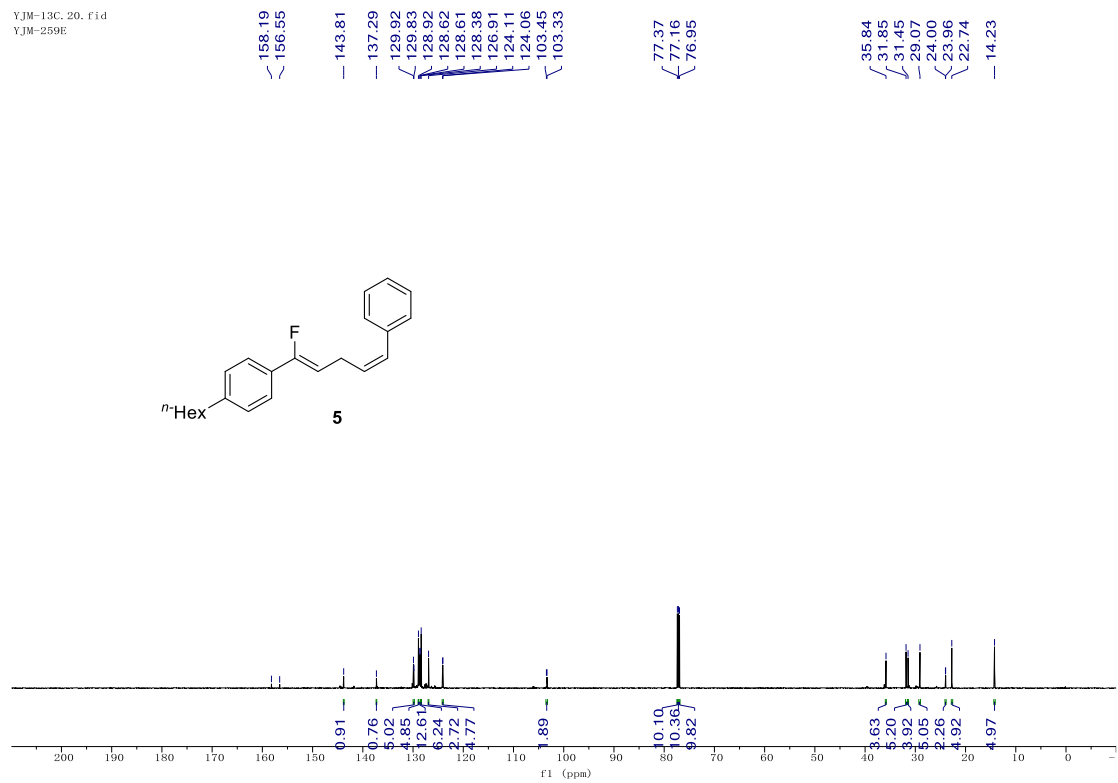

# <sup>19</sup>F NMR (565 MHz, CDCl<sub>3</sub>)

YJM-19F\_22.fid  
YJM-259E

-101.209  
-101.246  
-119.109  
-119.174

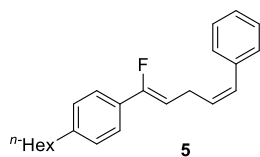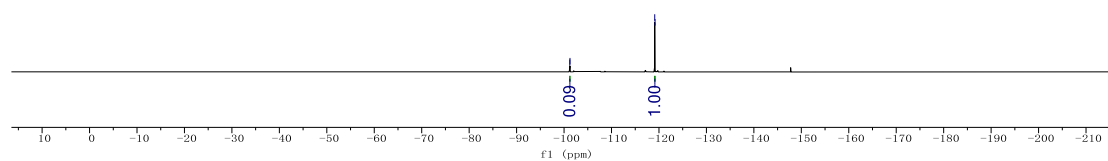

# <sup>1</sup>H NMR (600 MHz, CDCl<sub>3</sub>)

YJM-1H\_97.fid  
YJM-236a

8.031  
8.017  
7.568  
7.554  
7.379  
7.366  
7.354  
7.319  
7.316  
7.304  
7.259  
6.550  
6.531  
5.736  
5.724  
5.717  
5.711  
5.705  
5.692  
5.609  
5.597  
5.561  
5.549  
5.536  
4.400  
4.388  
4.376  
4.364  
3.348  
3.336  
3.323  
1.566  
1.412  
1.400  
1.388  
1.255  
-0.000

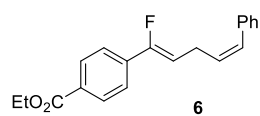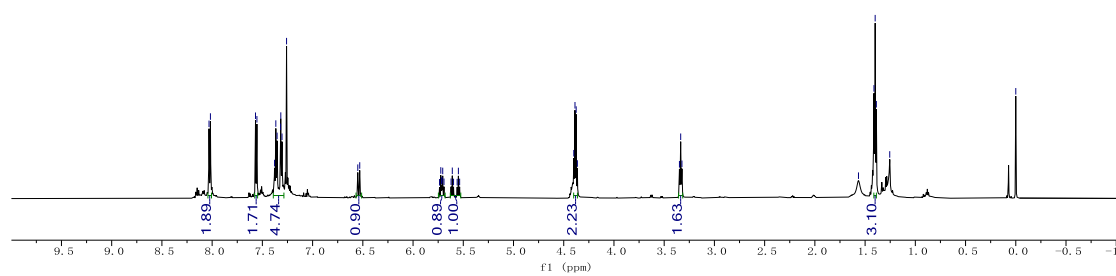



<sup>13</sup>C NMR (151 MHz, CDCl<sub>3</sub>)

YJM-13C\_14.fid  
YJM-236A

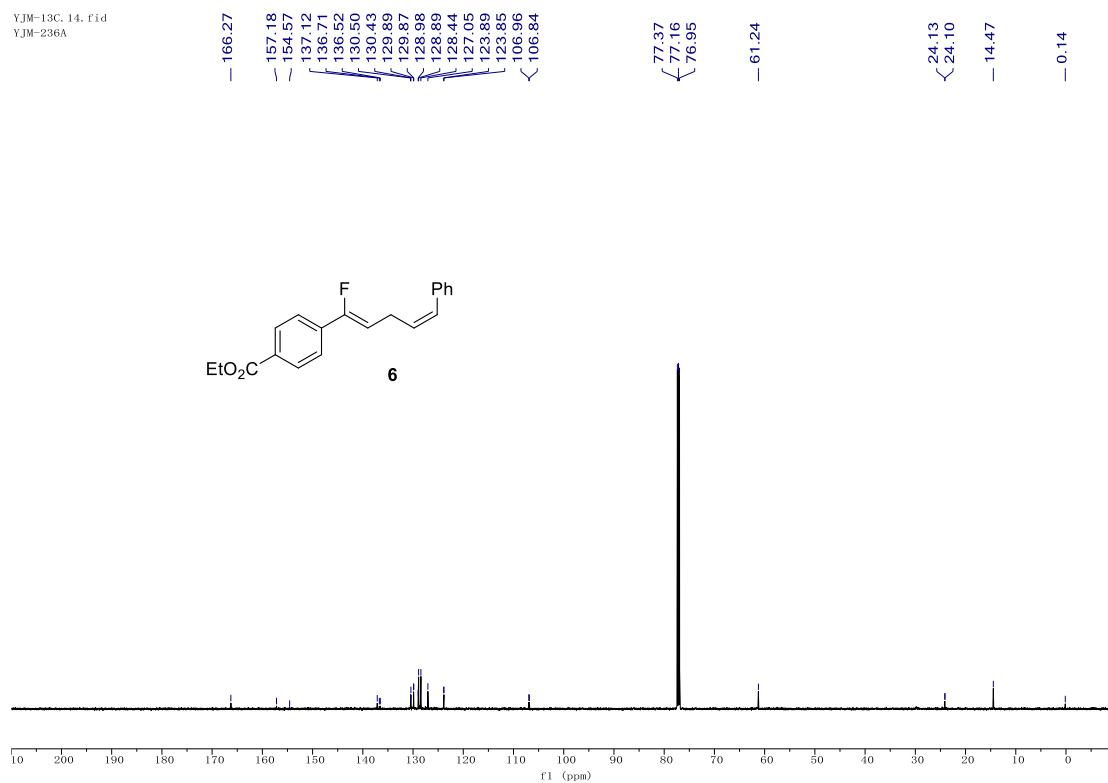

<sup>19</sup>F NMR (565 MHz, CDCl<sub>3</sub>)

YJM-19F\_16.fid  
YJM-236A

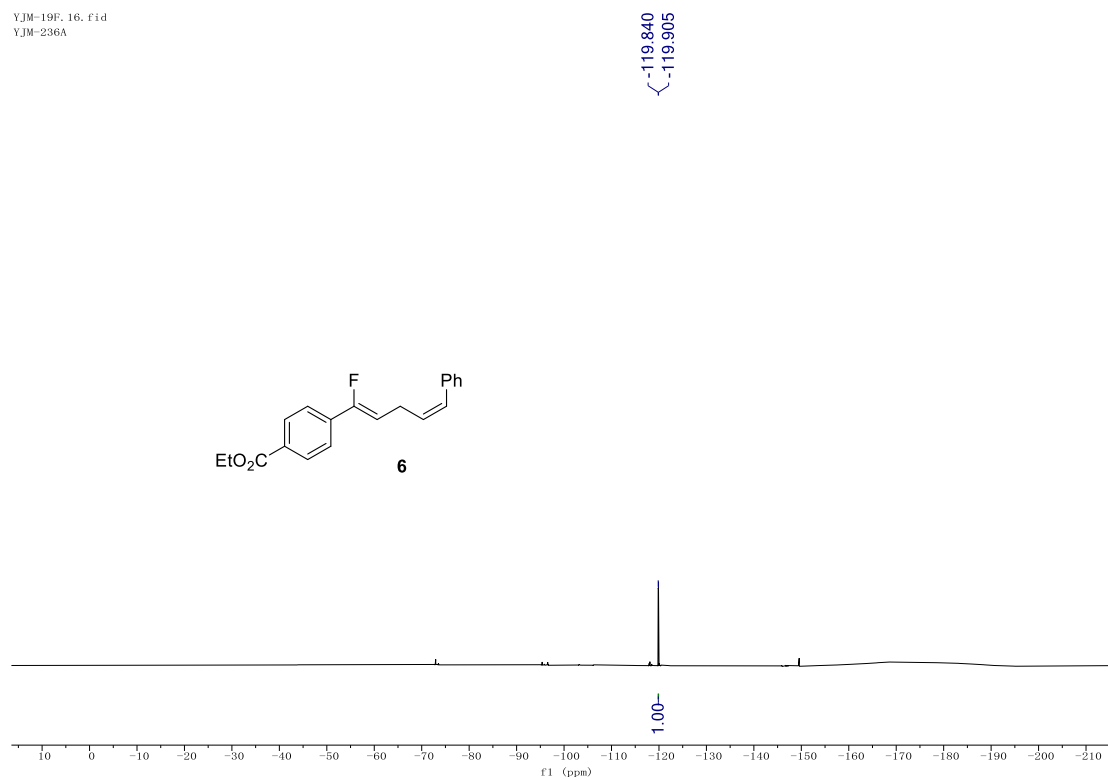

<sup>1</sup>H NMR (600 MHz, CDCl<sub>3</sub>)

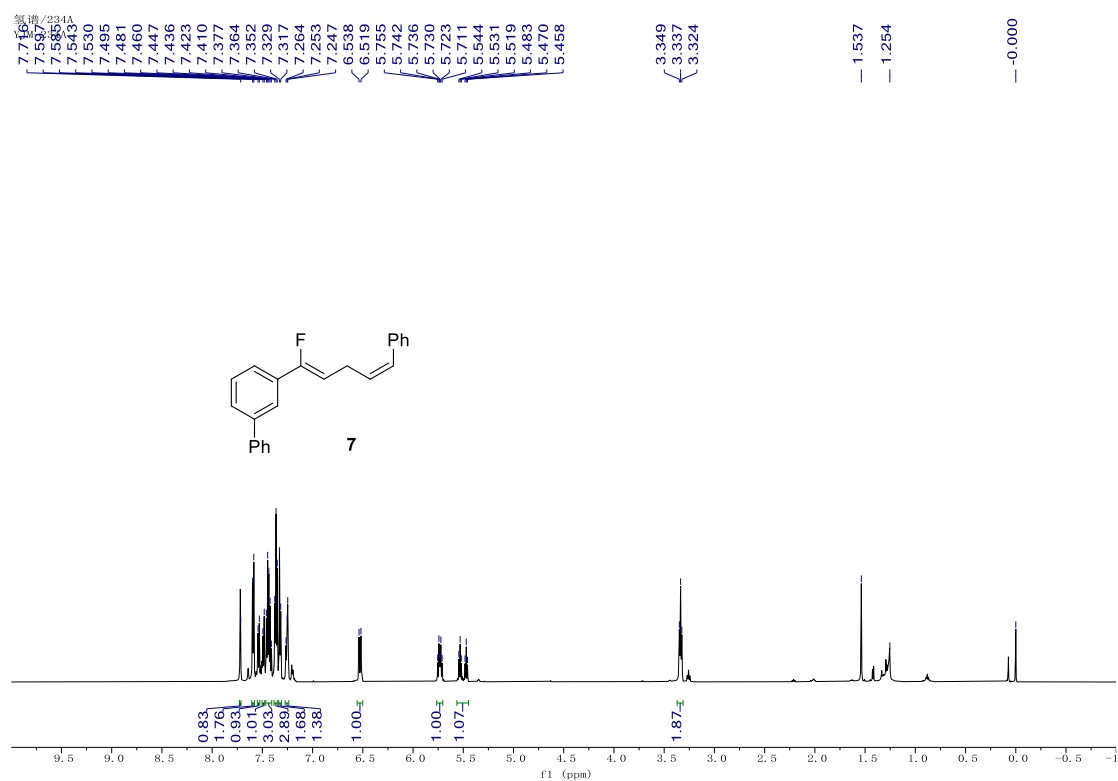

<sup>13</sup>C NMR (151 MHz, CDCl<sub>3</sub>)

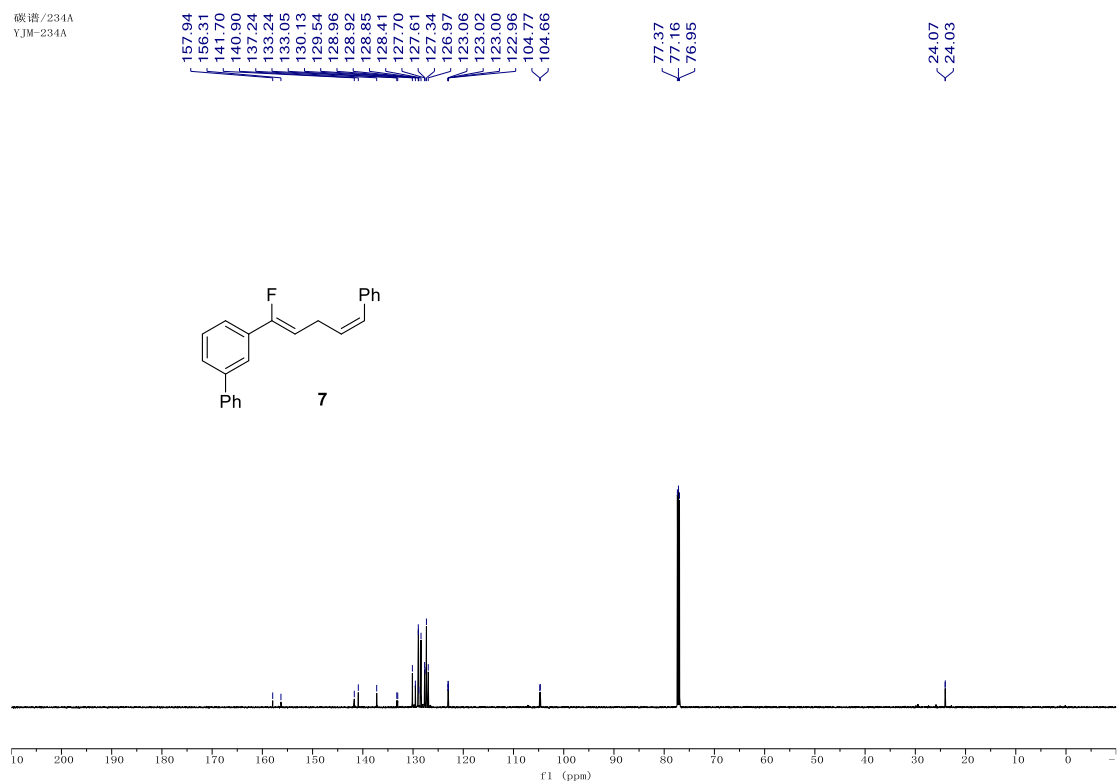

<sup>19</sup>F NMR (565 MHz, CDCl<sub>3</sub>)

氟谱 / 234A  
YJM-234A

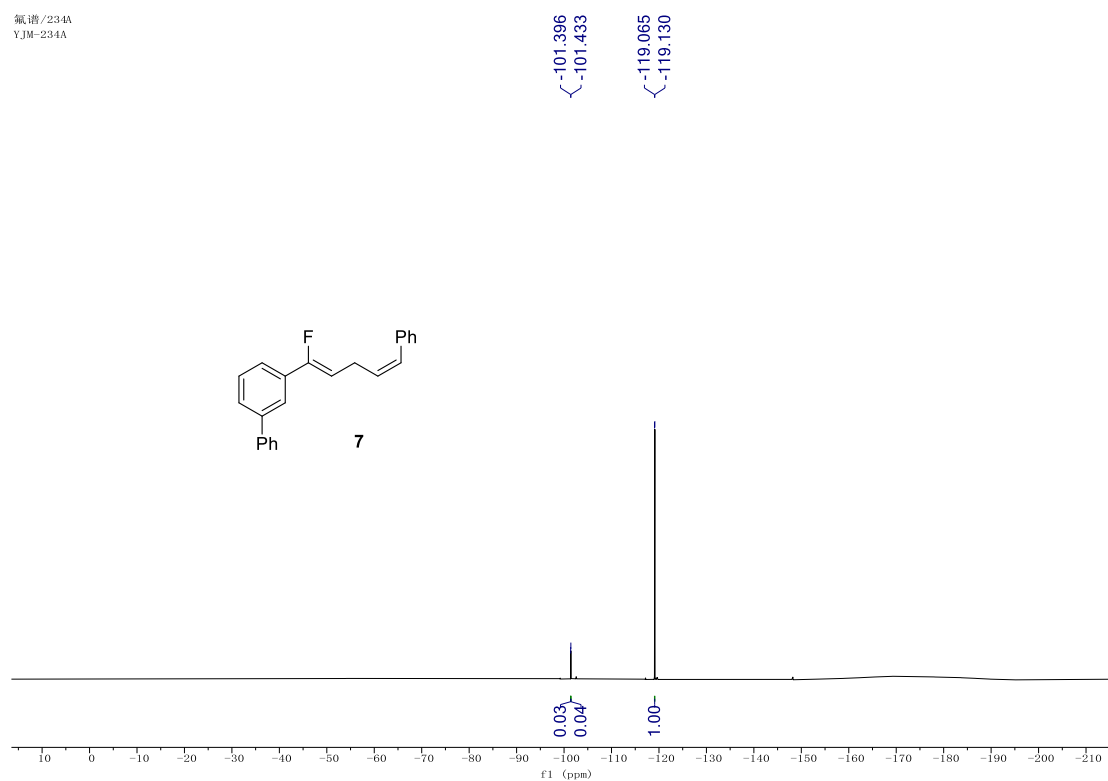

<sup>1</sup>H NMR (600 MHz, CDCl<sub>3</sub>)

氢谱 / 235C  
YJM-235C

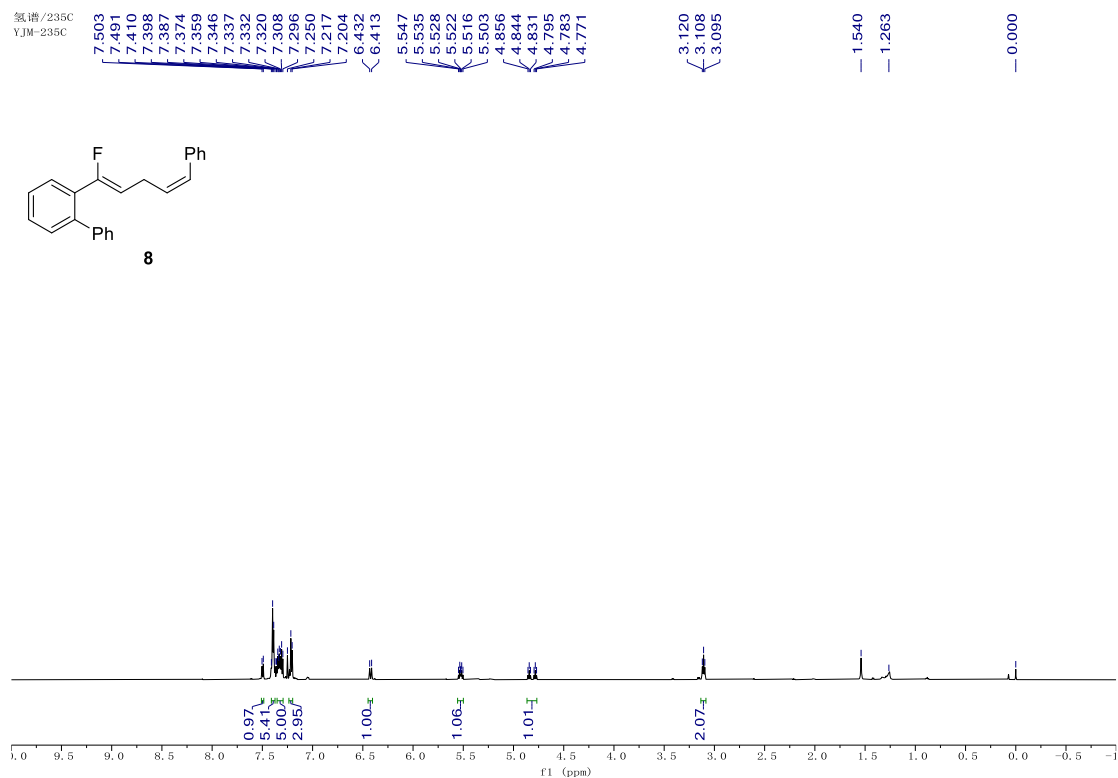

# <sup>13</sup>C NMR (151 MHz, CDCl<sub>3</sub>)

碳谱/235C  
YJM-235C

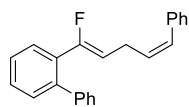

8

158.13  
156.47  
141.58  
140.78  
137.23  
132.00  
131.92  
130.72  
129.81  
129.47  
129.08  
129.05  
128.86  
128.77  
128.36  
128.33  
127.31  
127.27  
126.84  
109.18  
109.07

77.37  
77.16  
76.95

24.16  
24.13

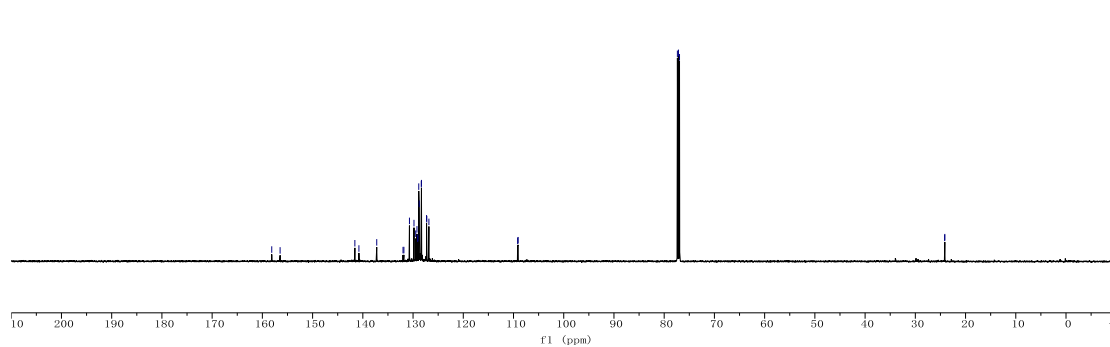

# <sup>19</sup>F NMR (565 MHz, CDCl<sub>3</sub>)

氟谱/235C  
YJM-235C

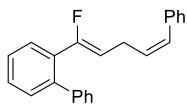

8

-90.595  
-90.628  
-103.366  
-103.430

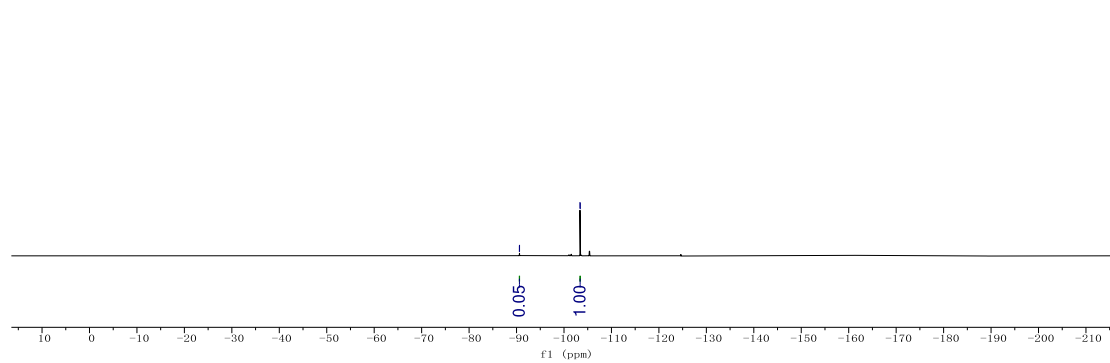

<sup>1</sup>H NMR (600 MHz, CDCl<sub>3</sub>)

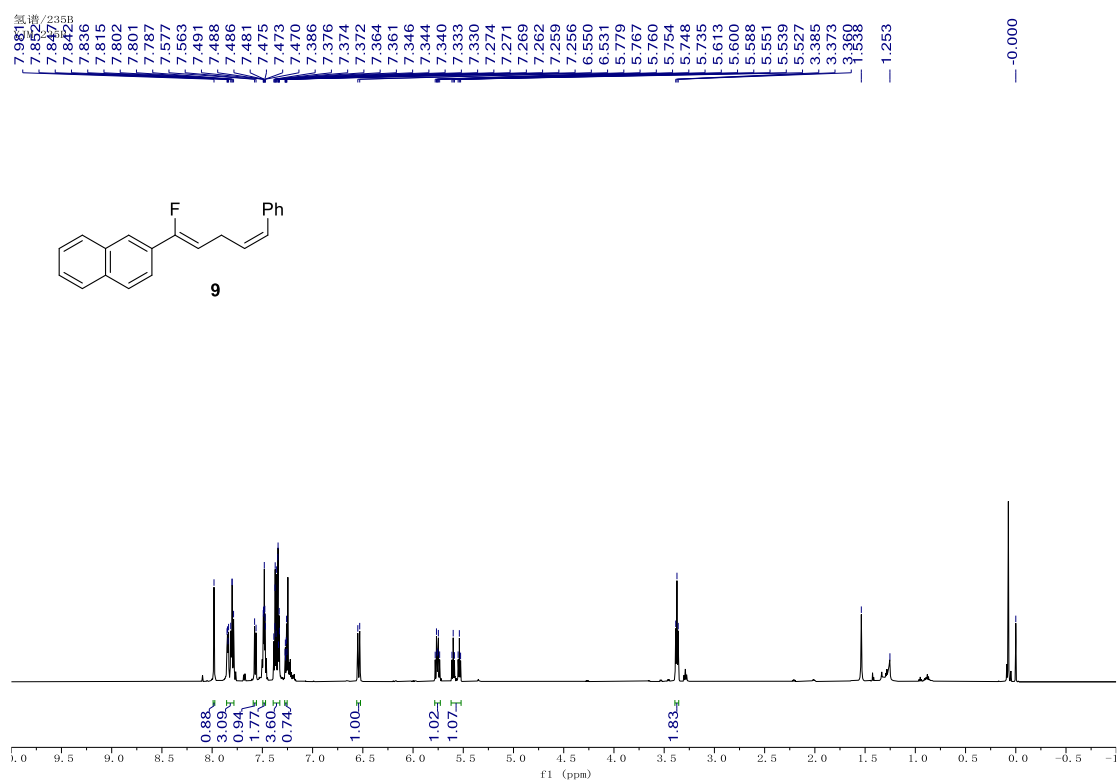

<sup>13</sup>C NMR (151 MHz, CDCl<sub>3</sub>)

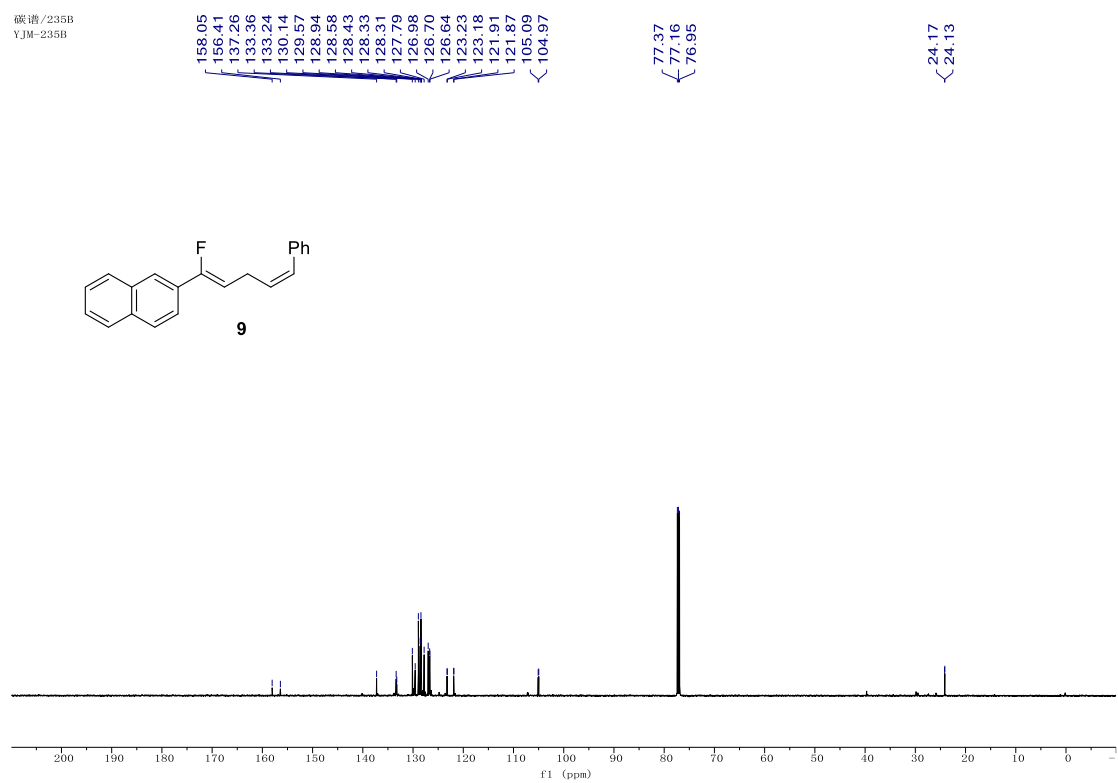

<sup>19</sup>F NMR (565 MHz, CDCl<sub>3</sub>)

氟谱/235B  
YJM-235B

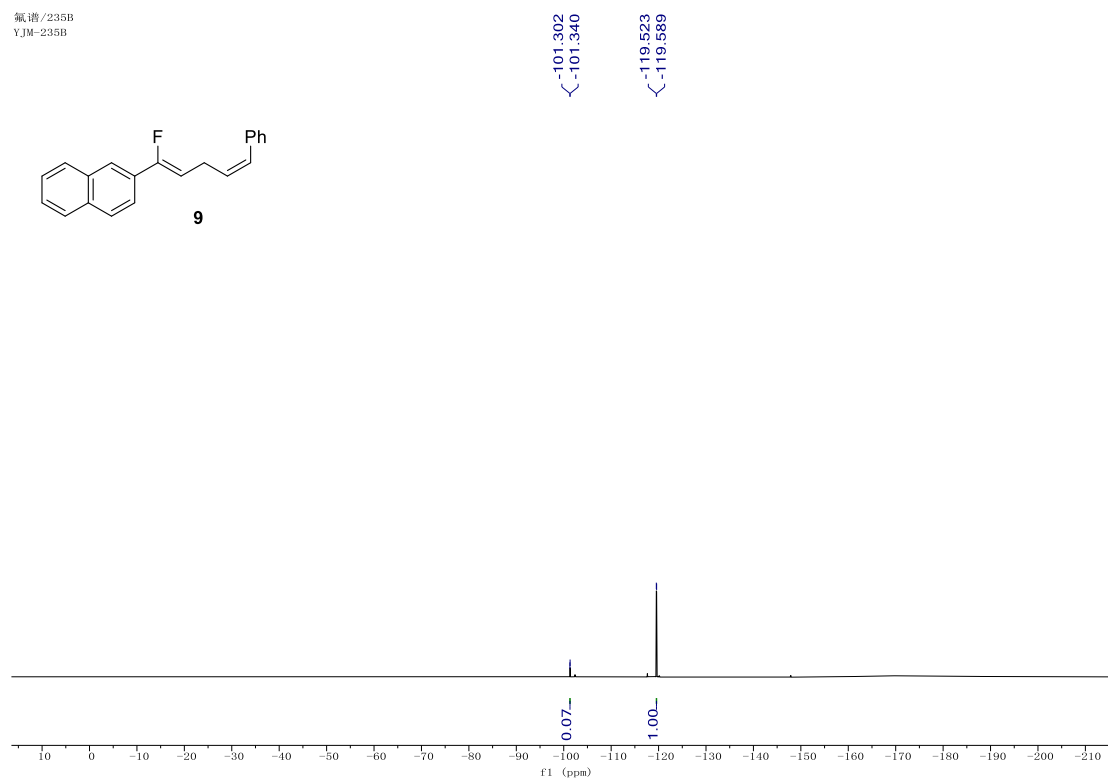

<sup>1</sup>H NMR (600 MHz, CDCl<sub>3</sub>)

YJM-1H, 28, f  
YJM-259A

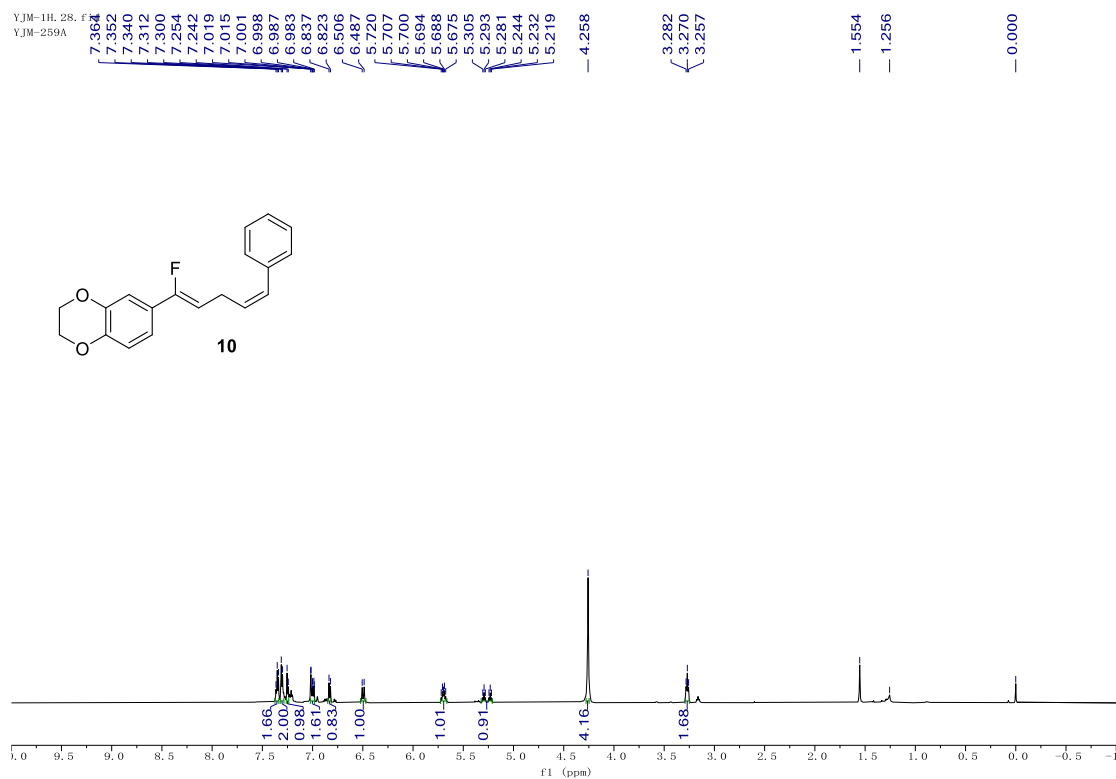

<sup>13</sup>C NMR (151 MHz, CDCl<sub>3</sub>)

YJM-13C. 21. f1d  
YJM-259A

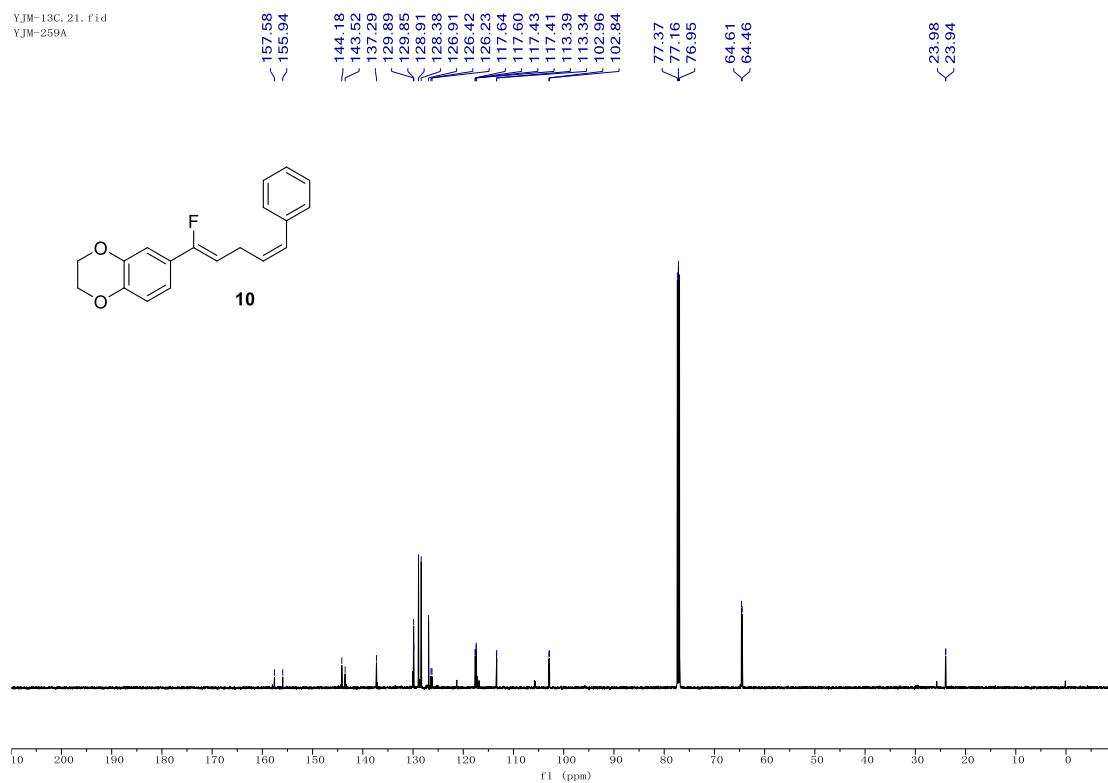

<sup>19</sup>F NMR (565 MHz, CDCl<sub>3</sub>)

YJM-19F. 23. f1d  
YJM-259A

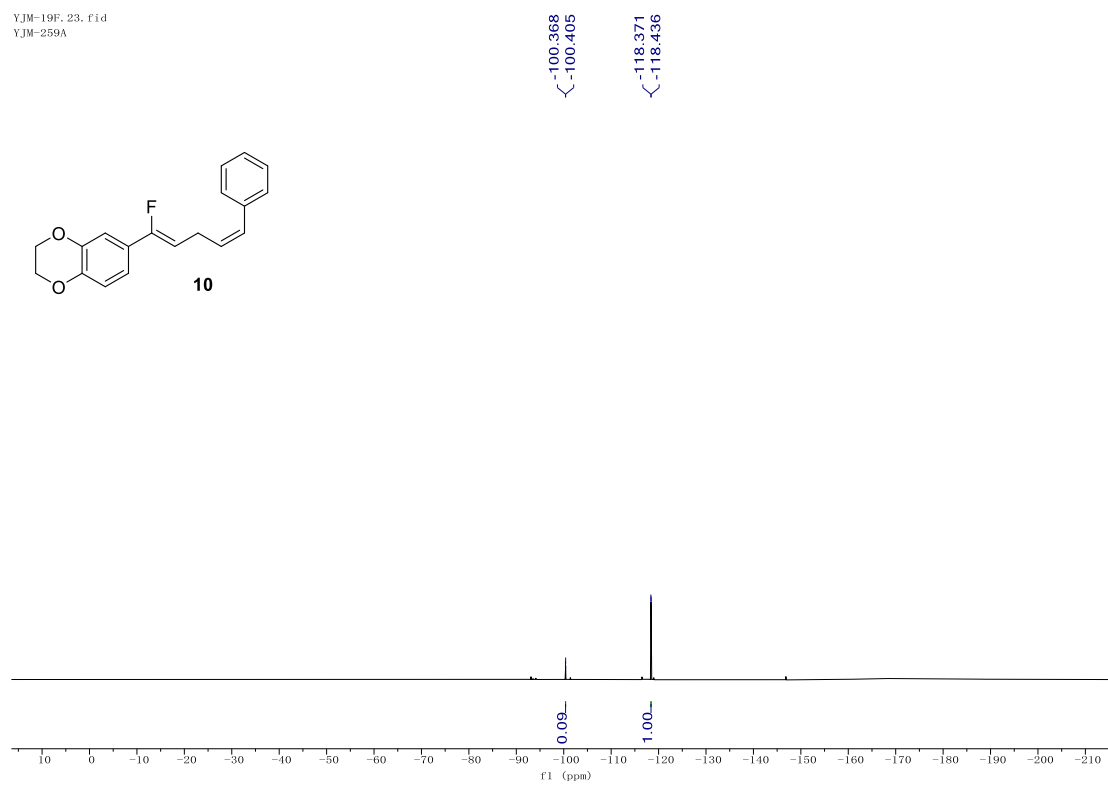

# <sup>1</sup>H NMR (600 MHz, CDCl<sub>3</sub>)

YJM-1H, 66, f1d  
YJM-244A

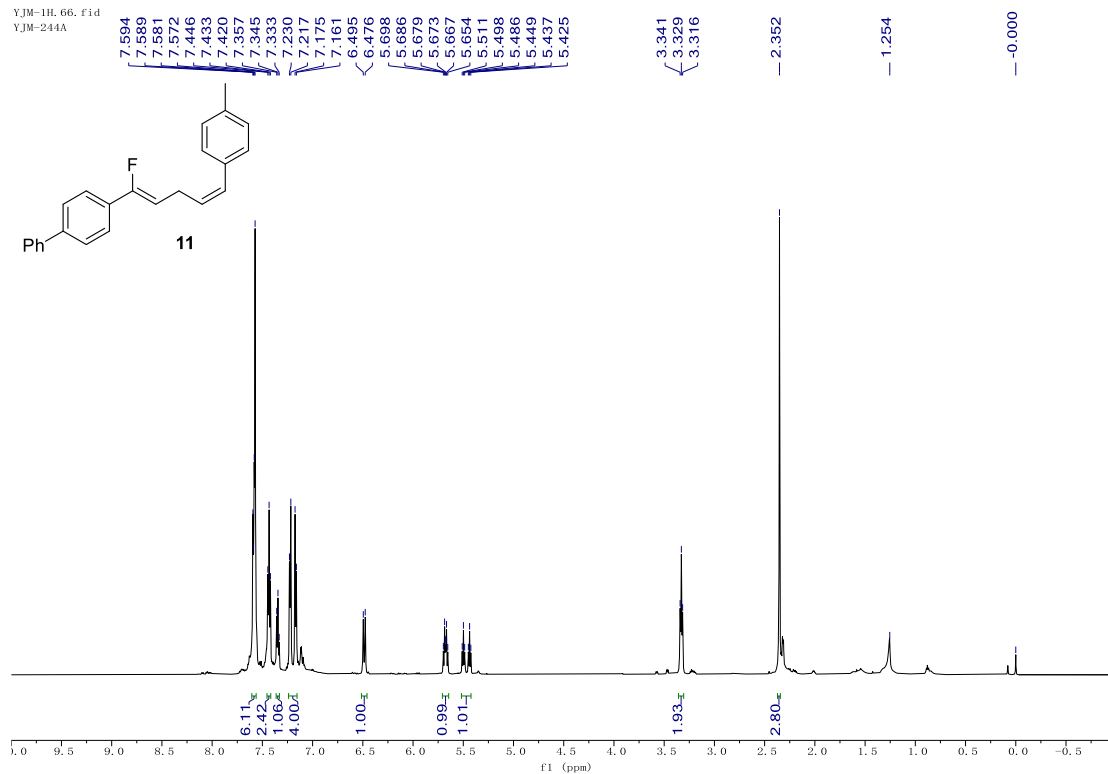

# <sup>13</sup>C NMR (151 MHz, CDCl<sub>3</sub>)

YJM-13C, 5, f1d  
YJM-244A

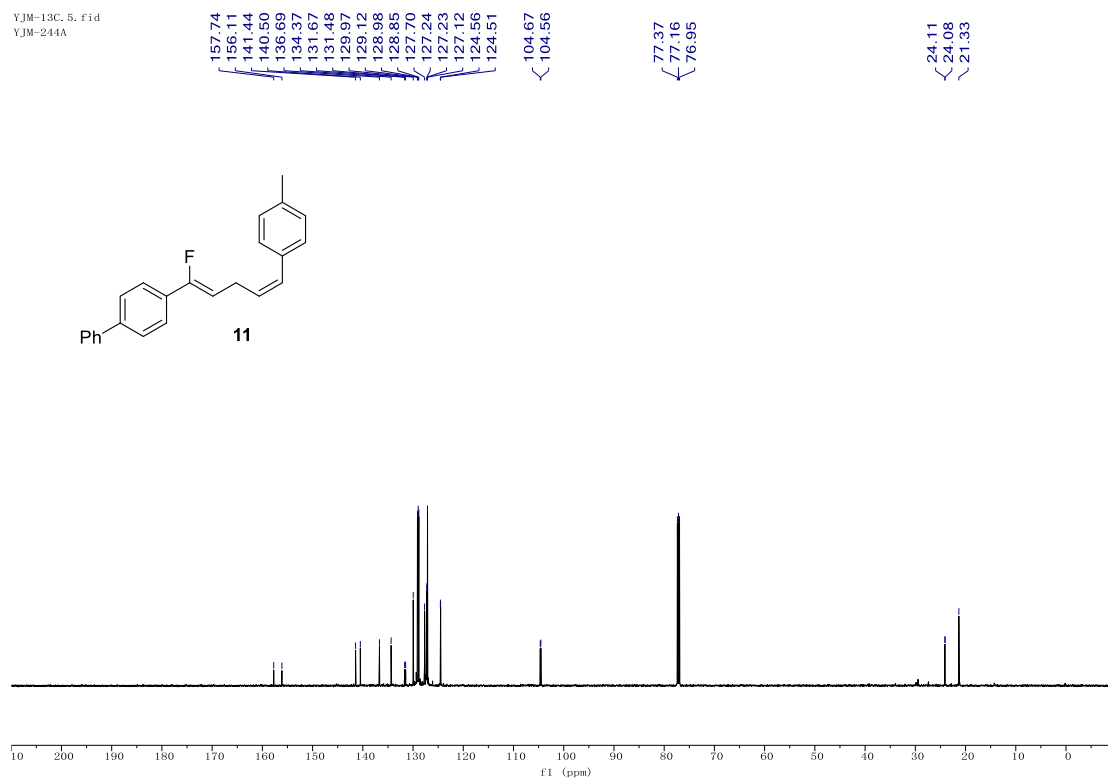



<sup>19</sup>F NMR (565 MHz, CDCl<sub>3</sub>)

YJM-19F, 8, f1d  
YJM-244A

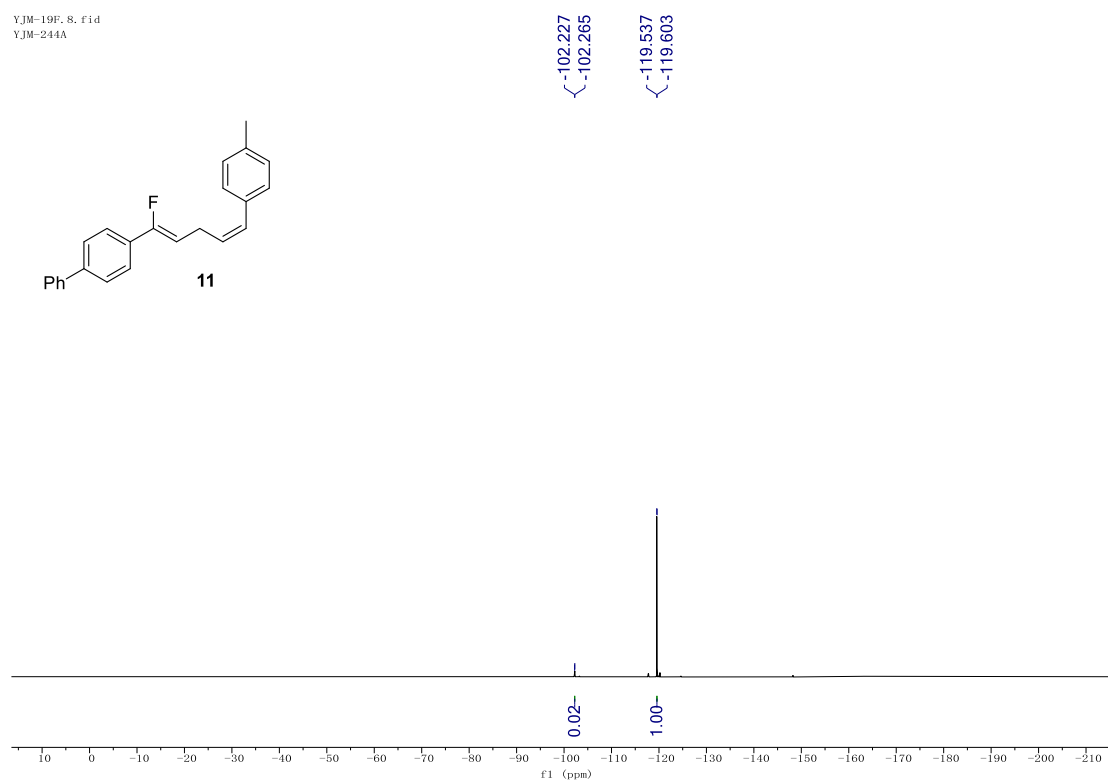

<sup>1</sup>H NMR (600 MHz, CDCl<sub>3</sub>)

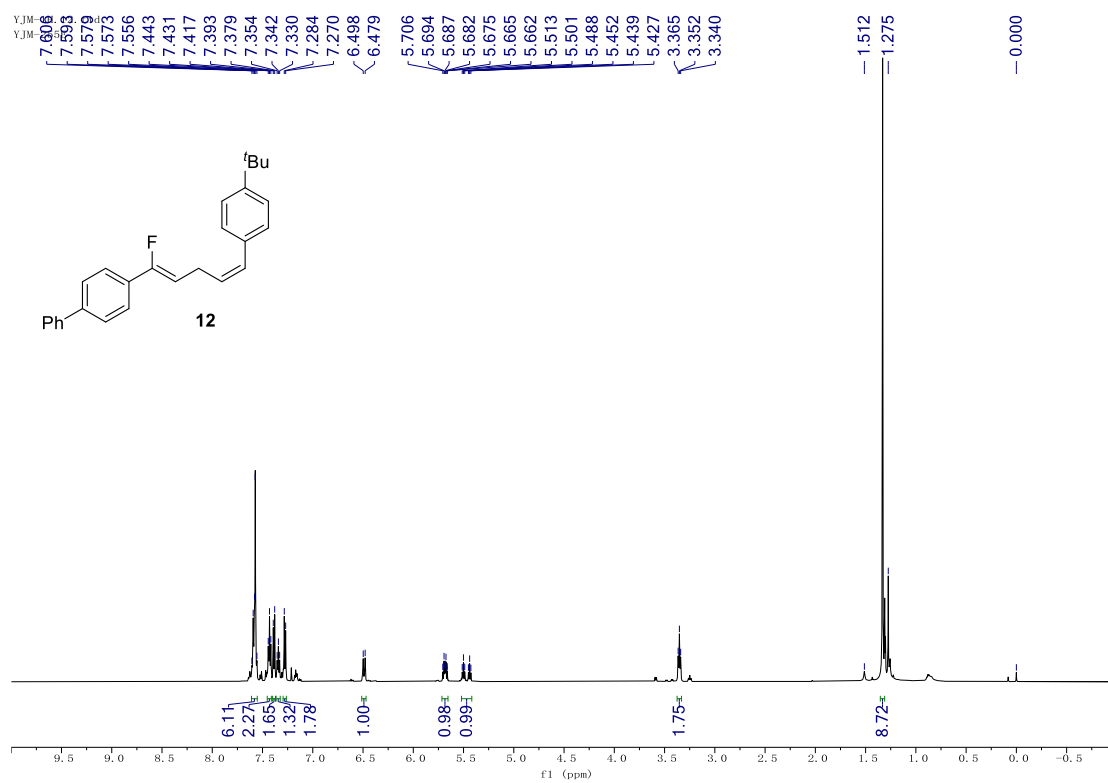

# <sup>13</sup>C NMR (151 MHz, CDCl<sub>3</sub>)

YJM-13C. 17. fid  
YJM-255E

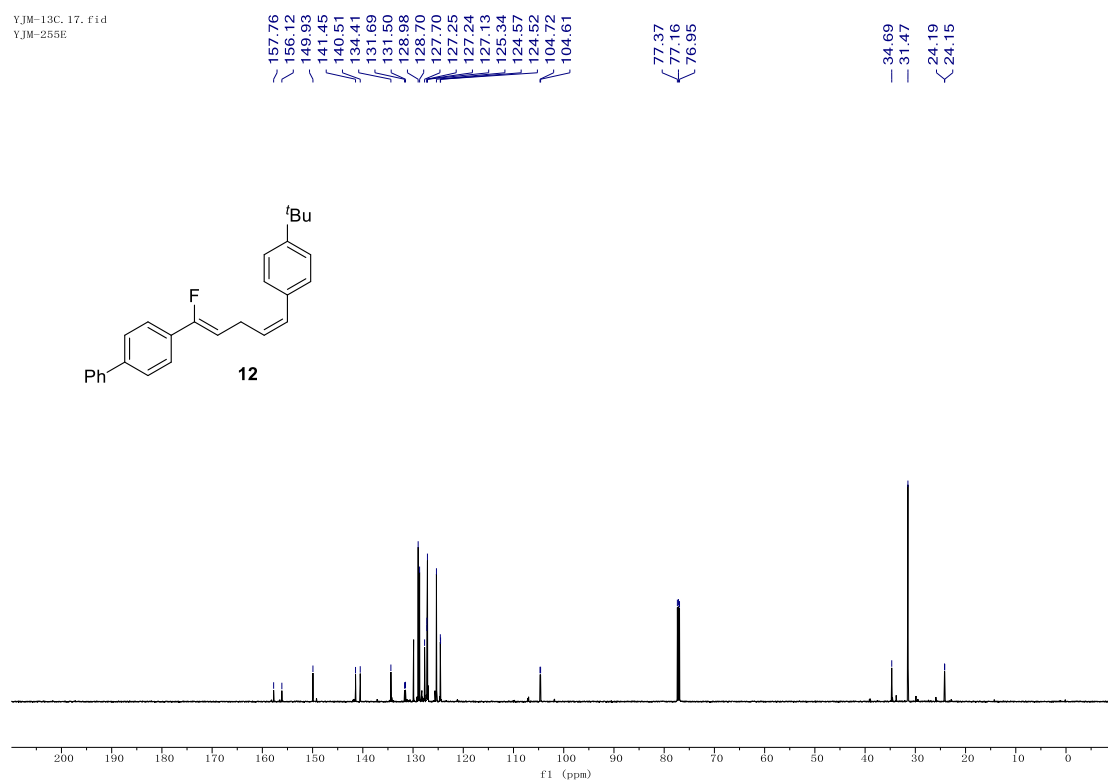

# <sup>19</sup>F NMR (565 MHz, CDCl<sub>3</sub>)

YJM-19F. 19. fid  
YJM-255E

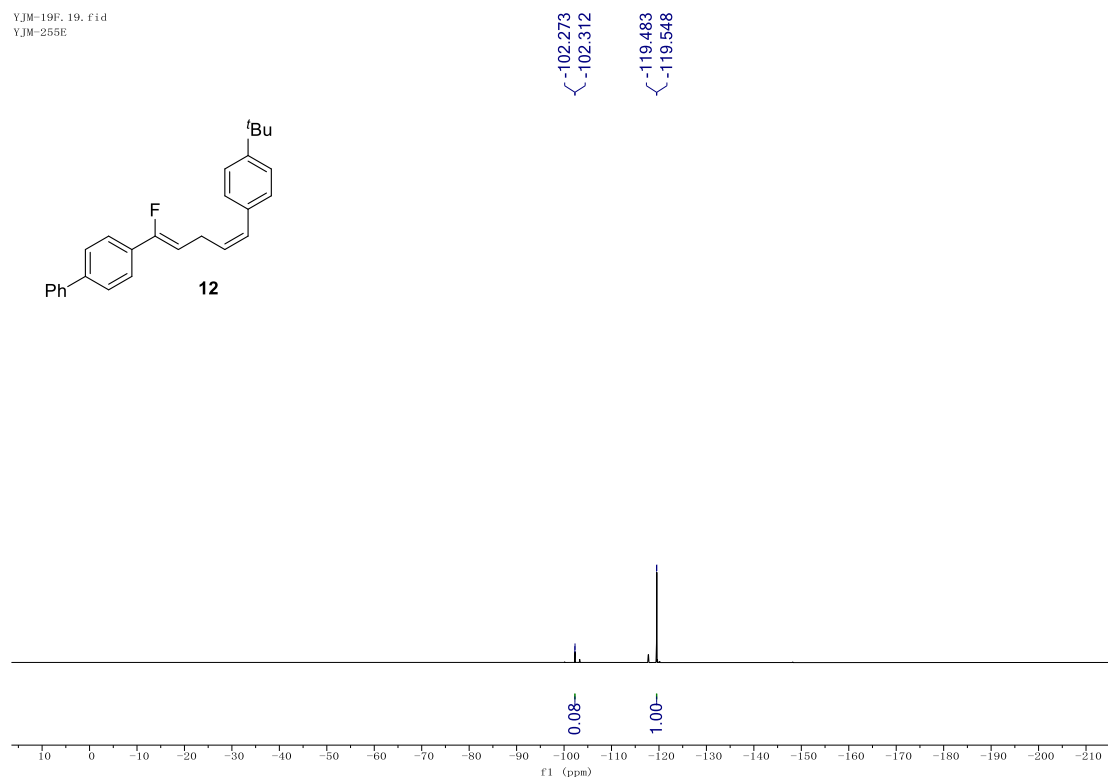

# <sup>1</sup>H NMR (600 MHz, CDCl<sub>3</sub>)

YJM-1H, 43, f1.d  
YJM-244E

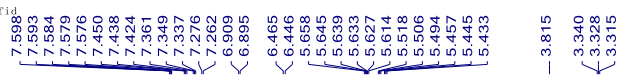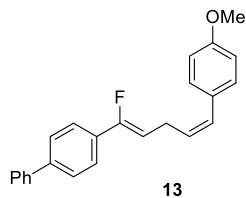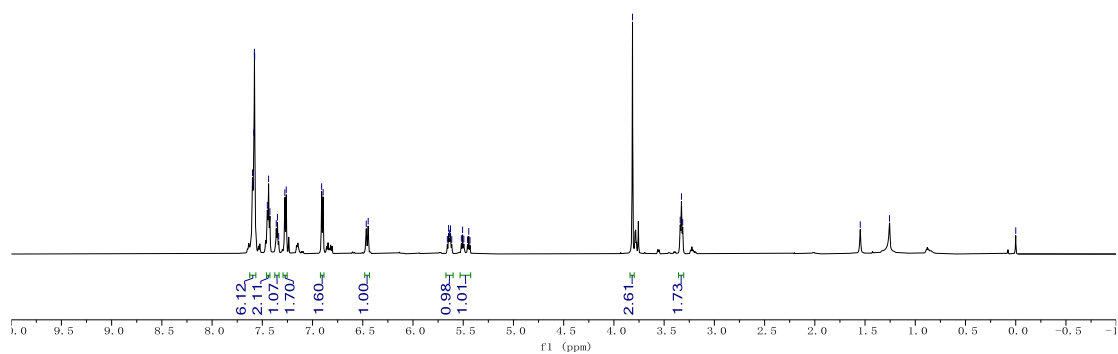

# <sup>13</sup>C NMR (151 MHz, CDCl<sub>3</sub>)

YJM-13C, 28, f1.d  
YJM-244E

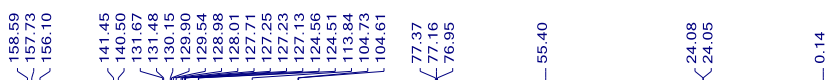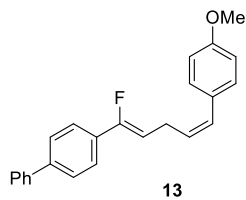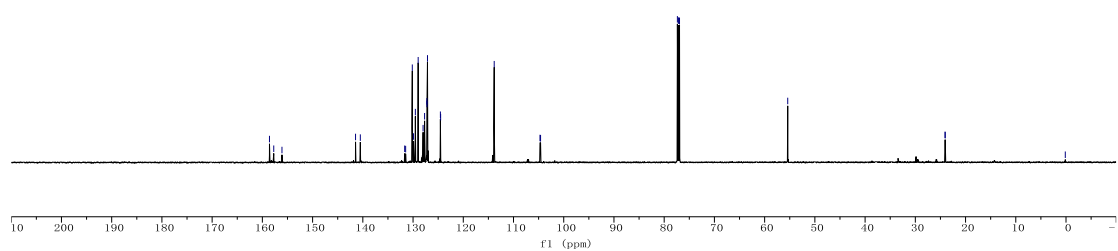

<sup>19</sup>F NMR (565 MHz, CDCl<sub>3</sub>)

YJM-19F, 30, f1d  
YJM-244E

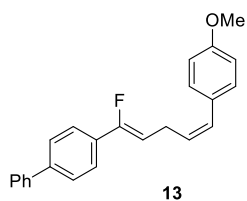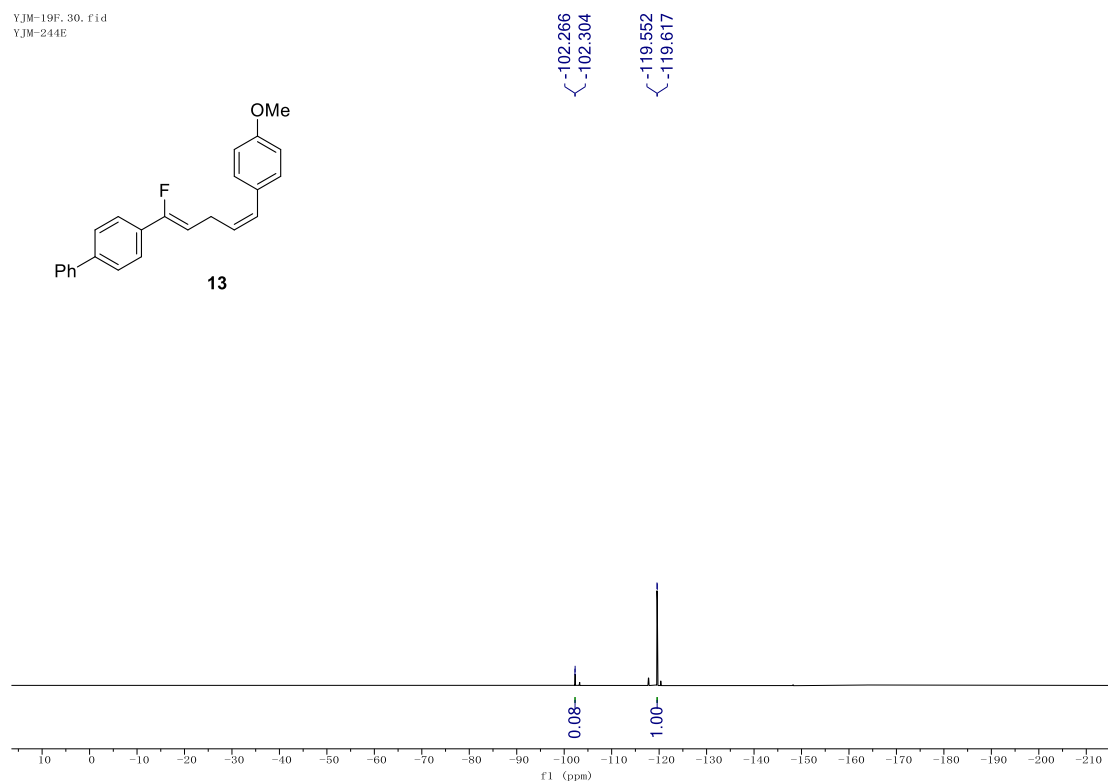

<sup>1</sup>H NMR (600 MHz, CDCl<sub>3</sub>)

YJM-19H, 30, f1d  
YJM-244E

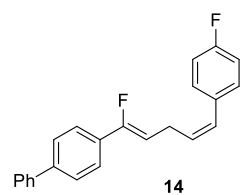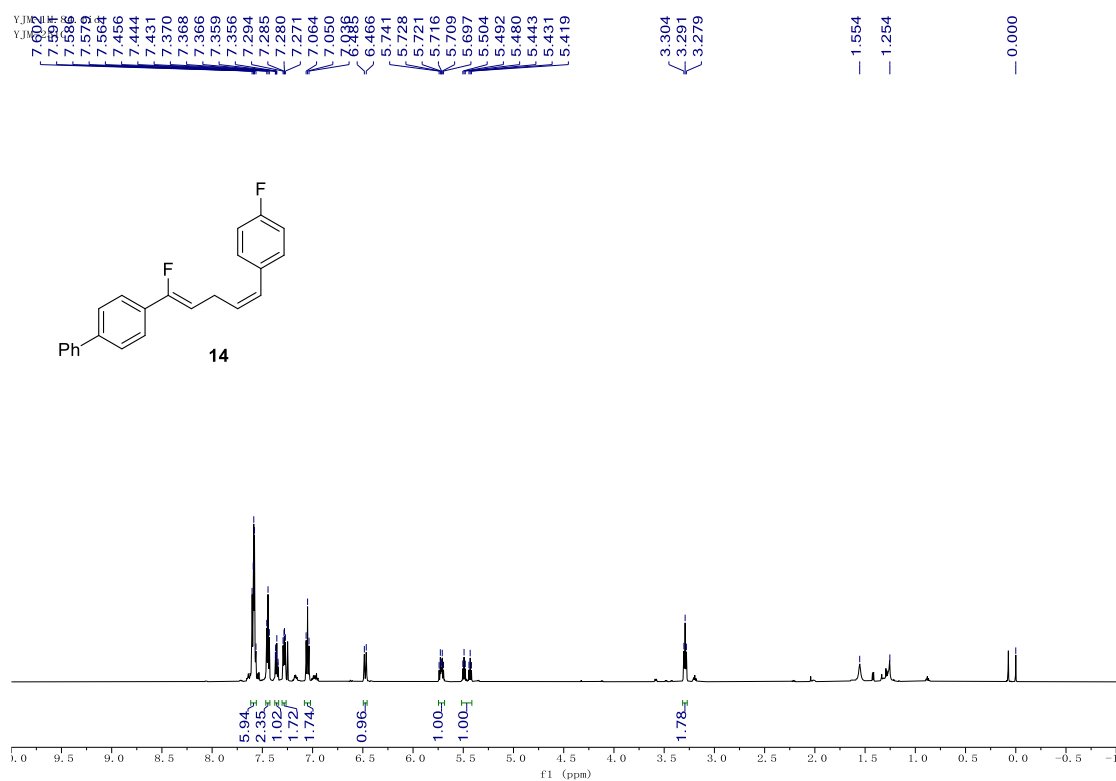

# <sup>13</sup>C NMR (151 MHz, CDCl<sub>3</sub>)

YJM-13C. 10. f1d  
YJM-251C

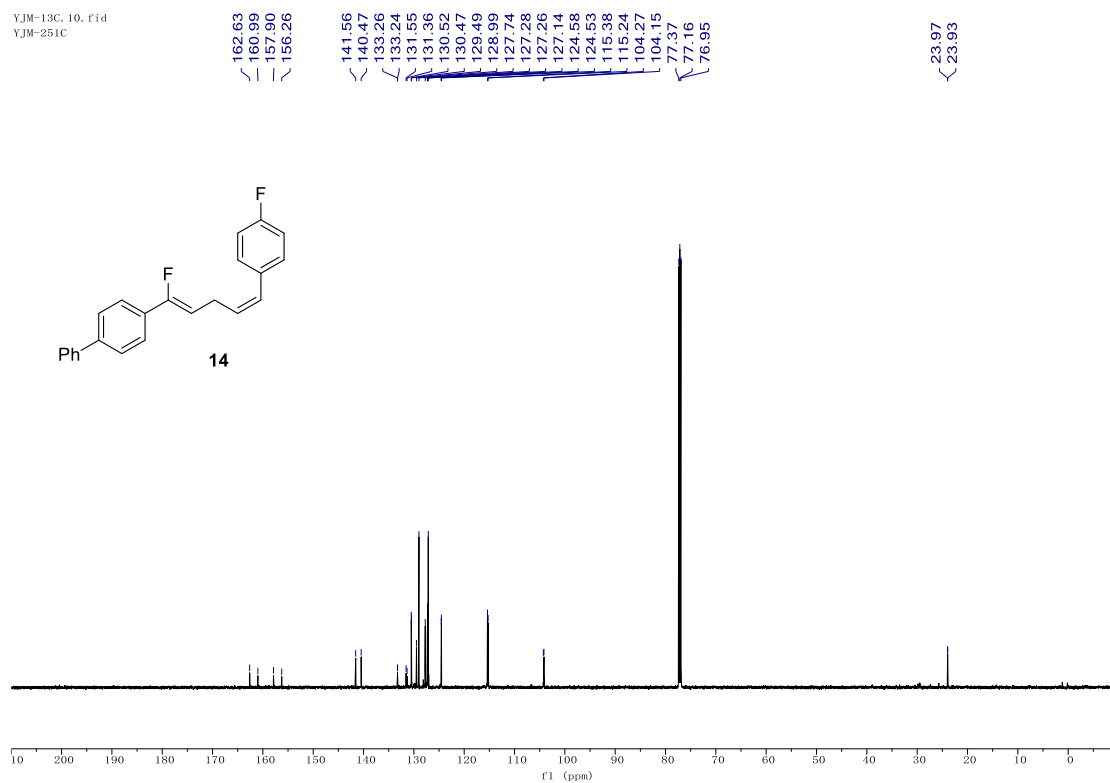

# <sup>19</sup>F NMR (565 MHz, CDCl<sub>3</sub>)

YJM-19F. 13. f1d  
YJM-251C

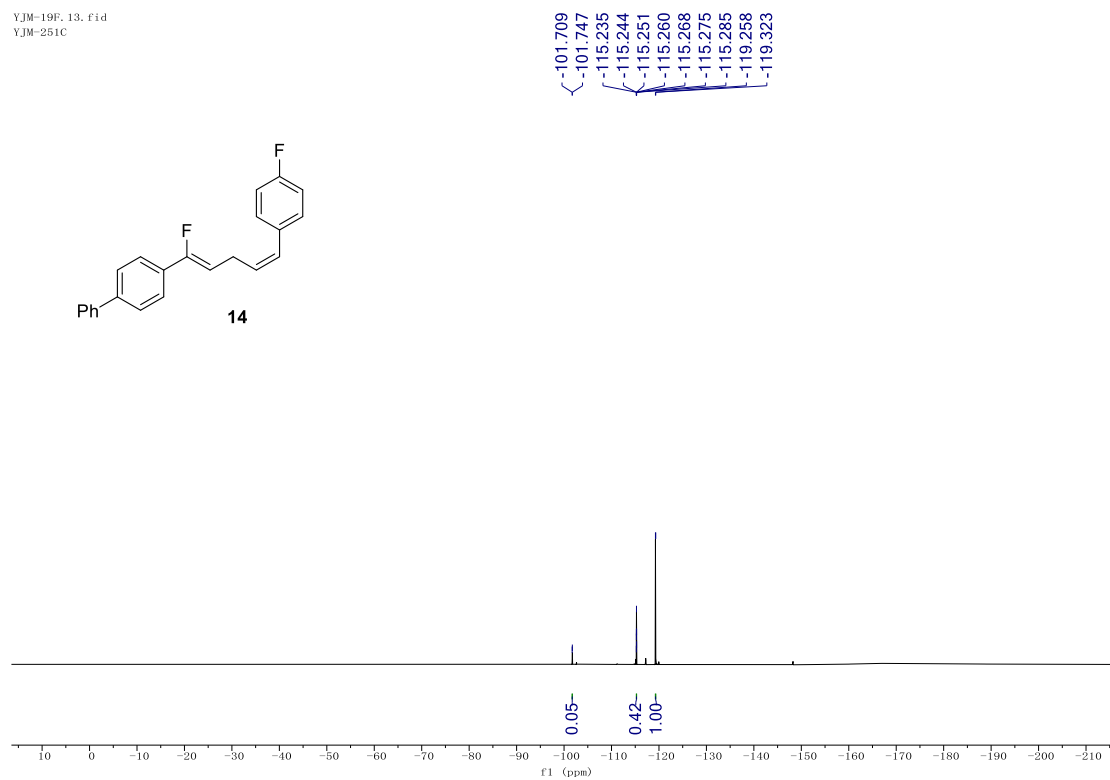

# <sup>1</sup>H NMR (600 MHz, CDCl<sub>3</sub>)

YJM-1H, 73, f1d  
YJM-244b

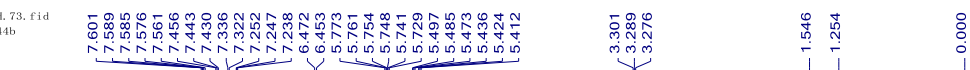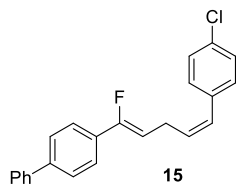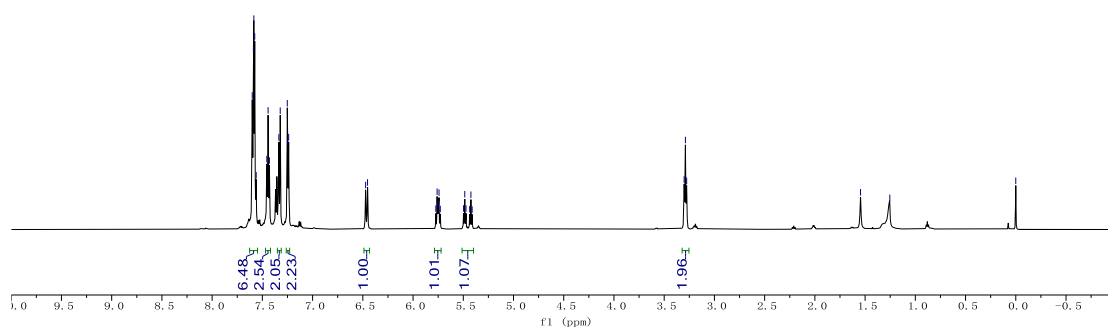

# <sup>13</sup>C NMR (151 MHz, CDCl<sub>3</sub>)

YJM-13C, 9, f1d  
YJM-244B

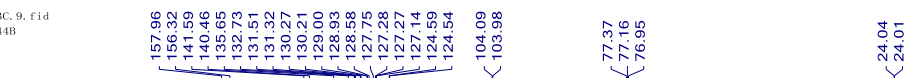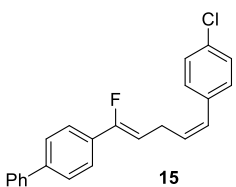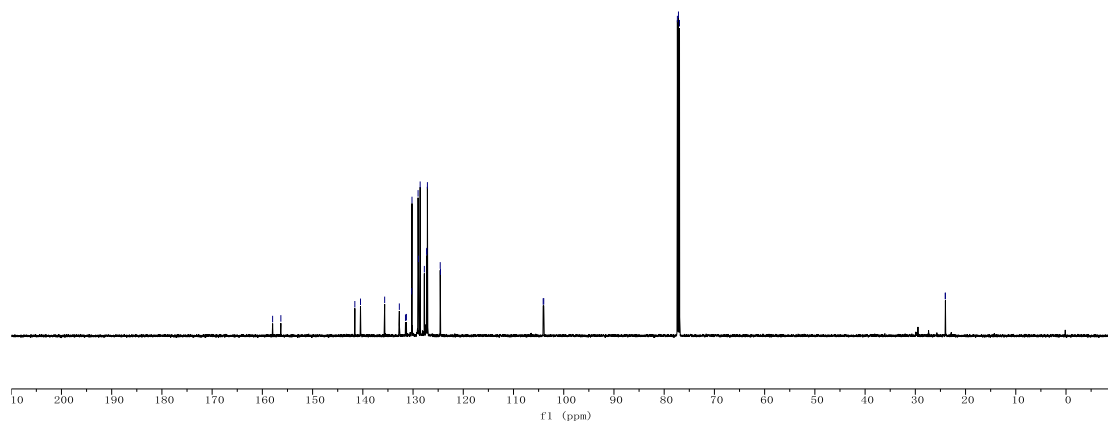

# <sup>19</sup>F NMR (565 MHz, CDCl<sub>3</sub>)

YJM-19F. 12. fid  
YJM-244B

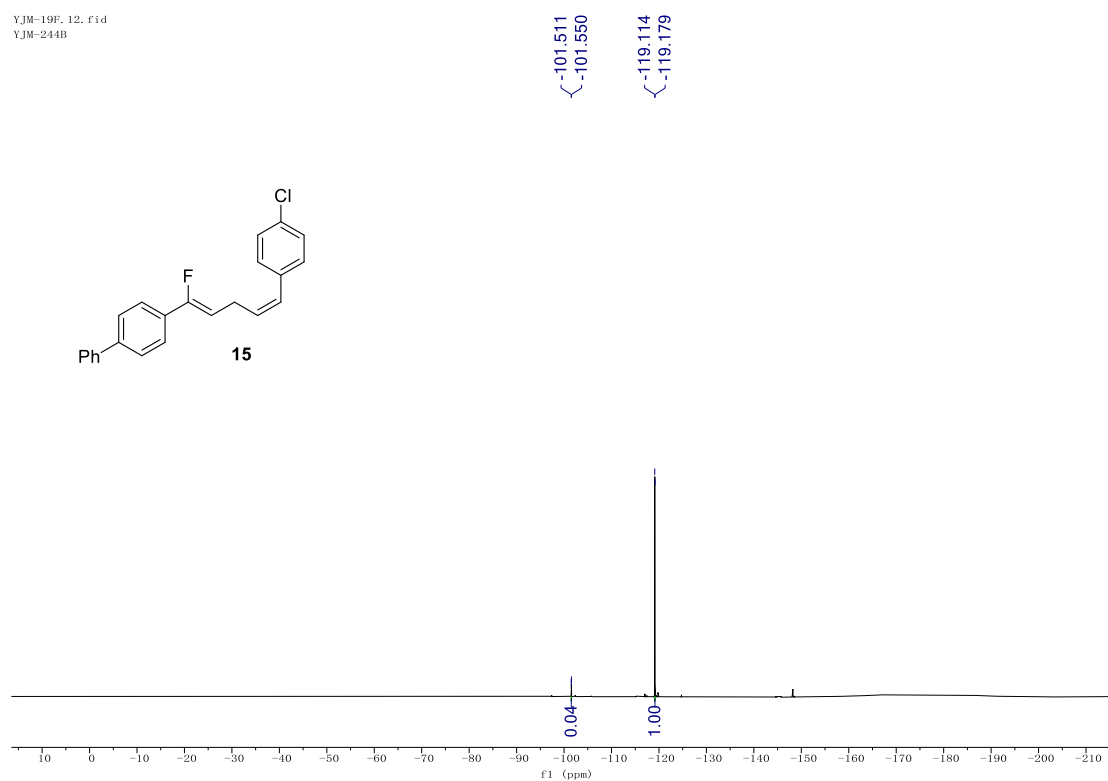

# <sup>1</sup>H NMR (600 MHz, CDCl<sub>3</sub>)

YJM-1H. 14. fid  
YJM-251d

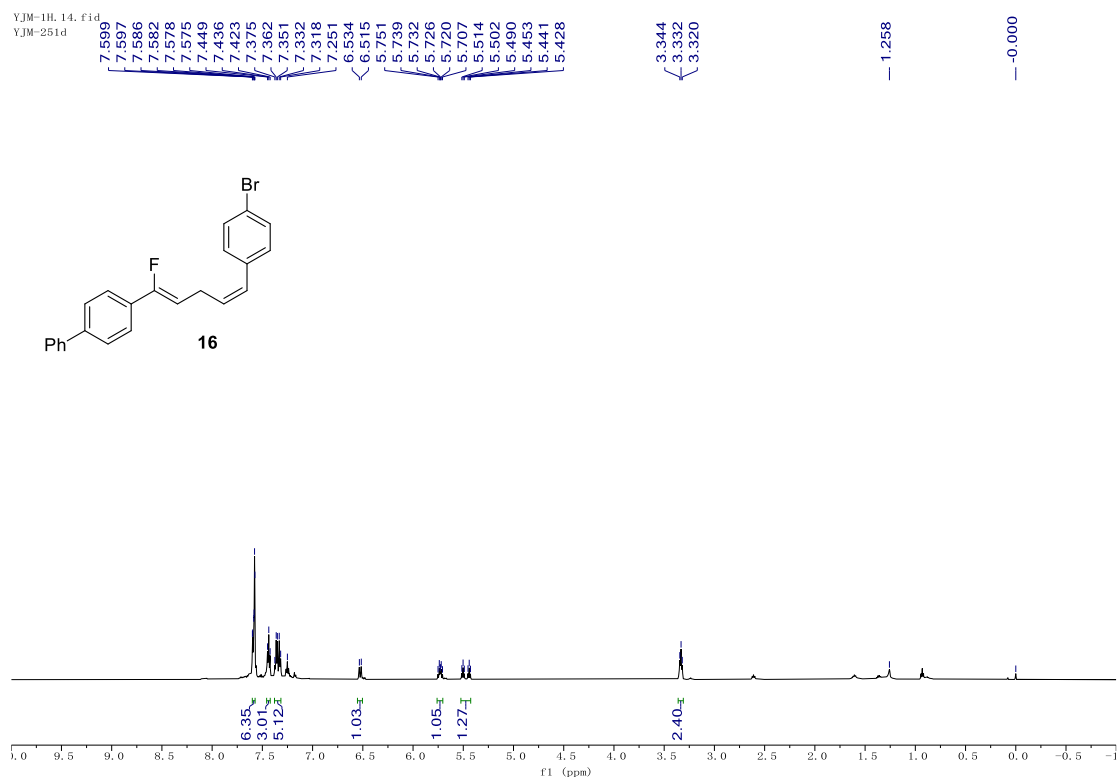

# <sup>13</sup>C NMR (151 MHz, CDCl<sub>3</sub>)

YJM-13C\_18.fid  
YJM-25101

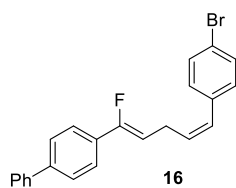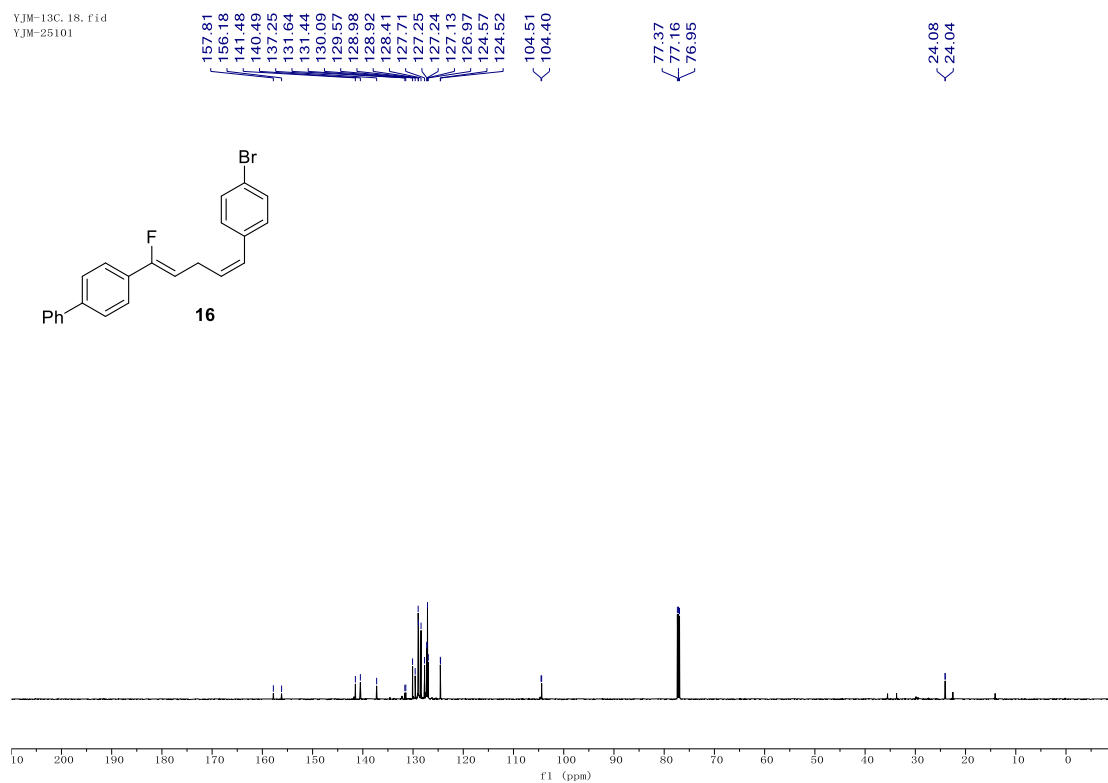

# <sup>19</sup>F NMR (565 MHz, CDCl<sub>3</sub>)

YJM-19F\_20.fid  
YJM-25101

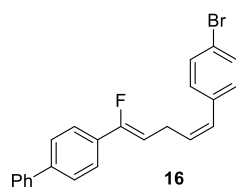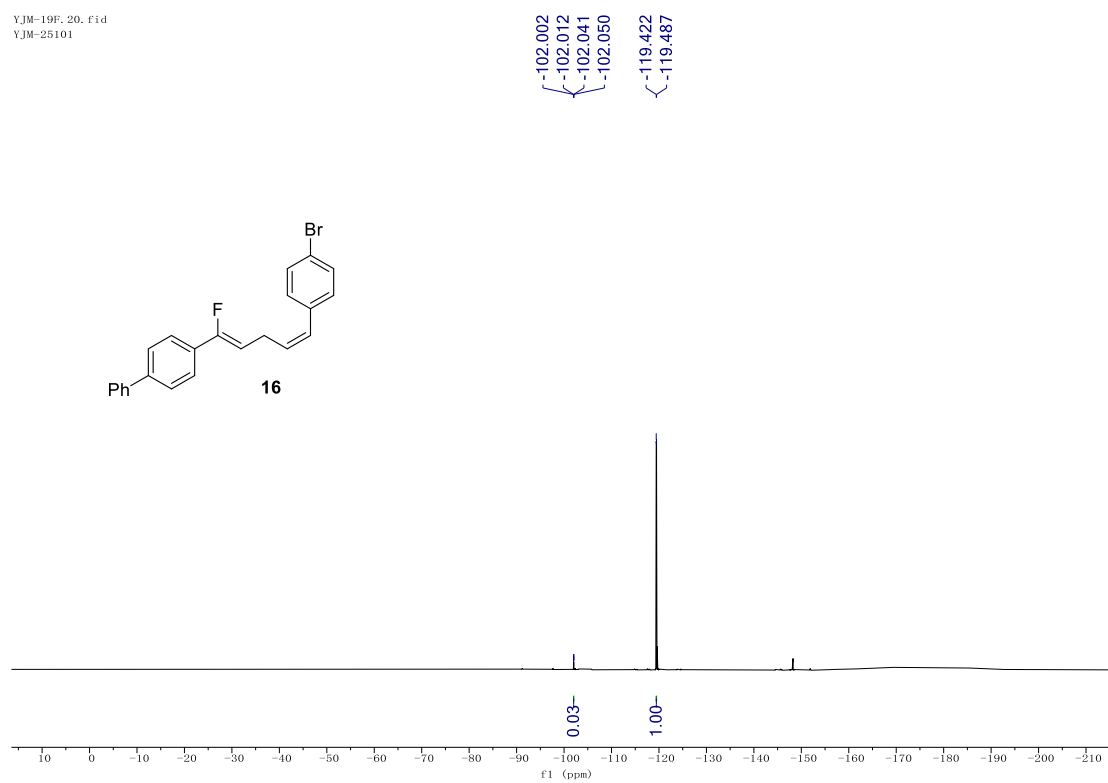



# <sup>1</sup>H NMR (600 MHz, CDCl<sub>3</sub>)

YJM-1H. 89. f1d  
YJM-251G

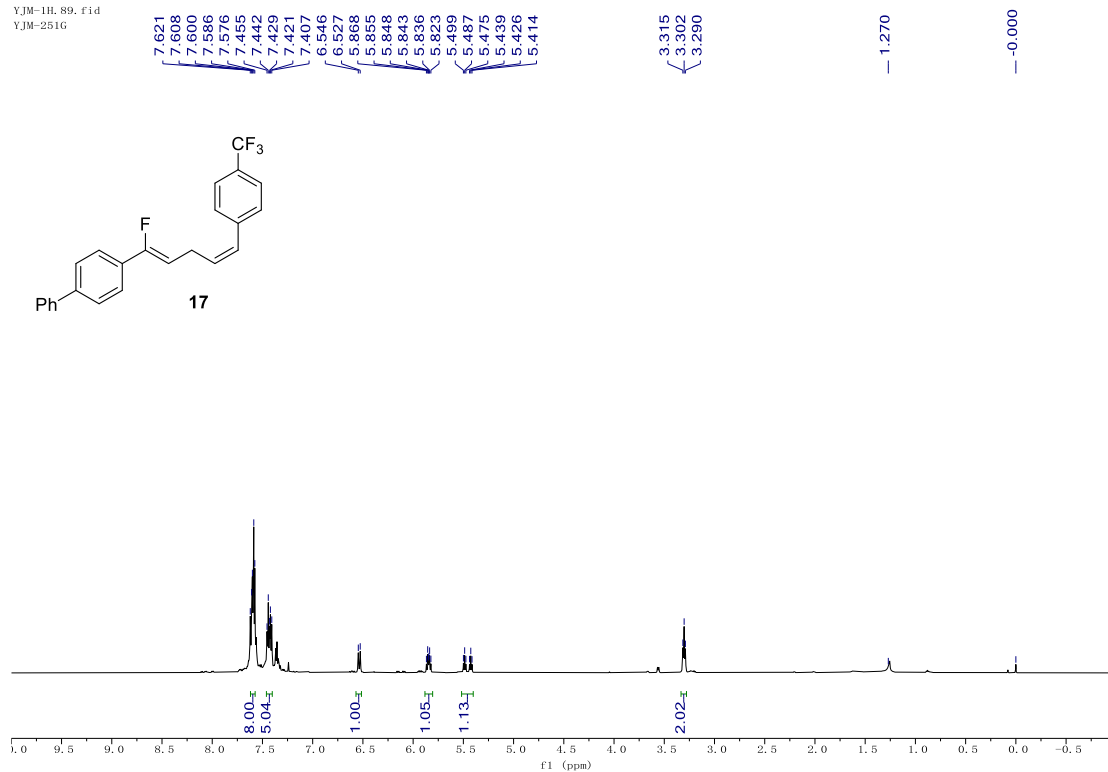

# <sup>13</sup>C NMR (151 MHz, CDCl<sub>3</sub>)

YJM-13C. 13. f1d  
YJM-251G

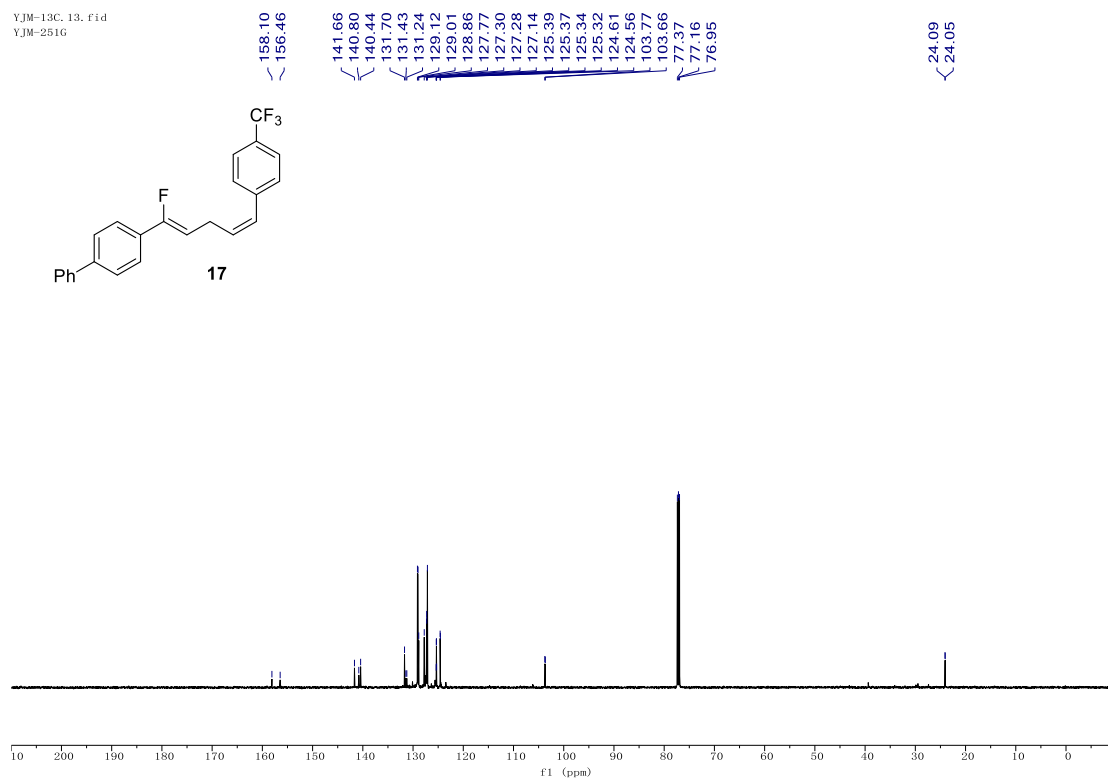

# <sup>19</sup>F NMR (565 MHz, CDCl<sub>3</sub>)

YJM-19F\_14.fid  
YJM-251G

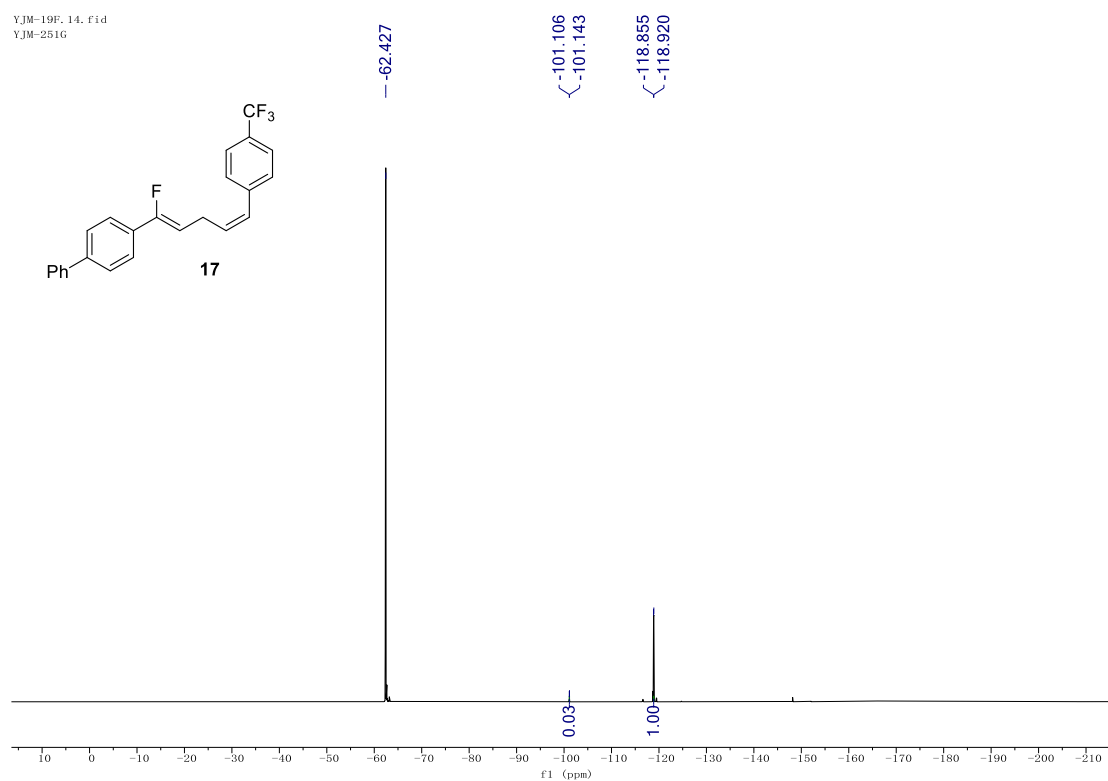

# <sup>1</sup>H NMR (600 MHz, CDCl<sub>3</sub>)

YJM-1H-14.fid  
YJM-241G

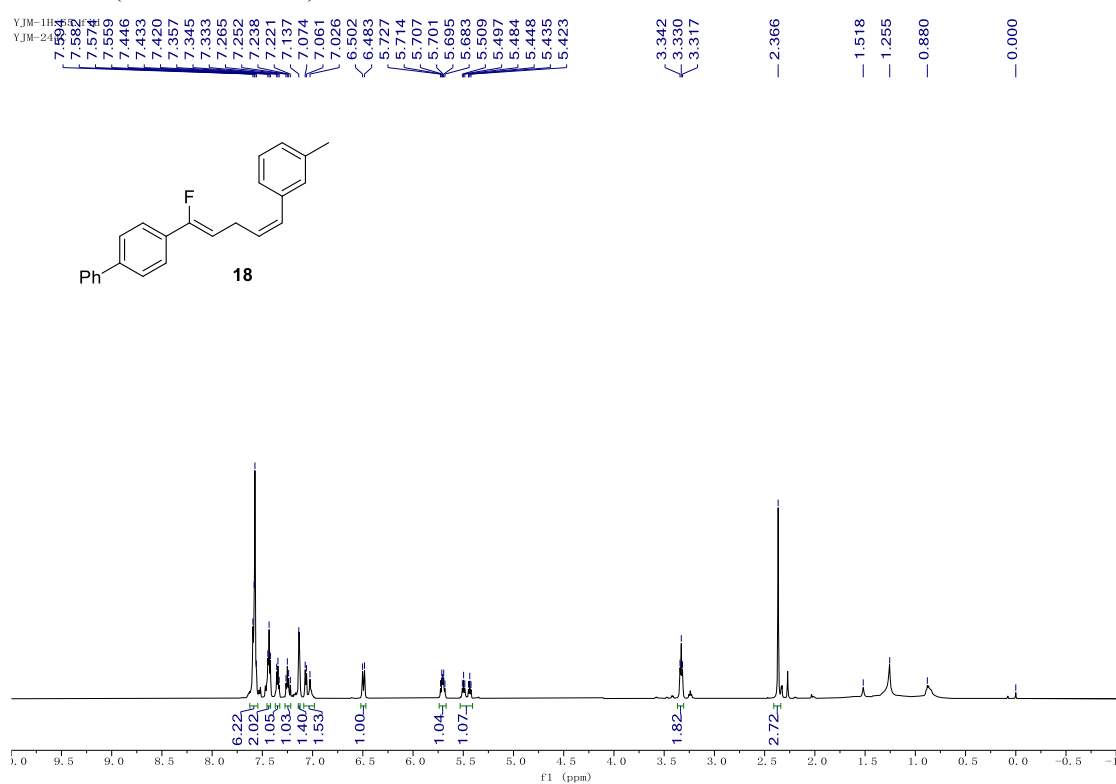

# <sup>13</sup>C NMR (151 MHz, CDCl<sub>3</sub>)

YJM-13C. 6. fid  
YJM-244C

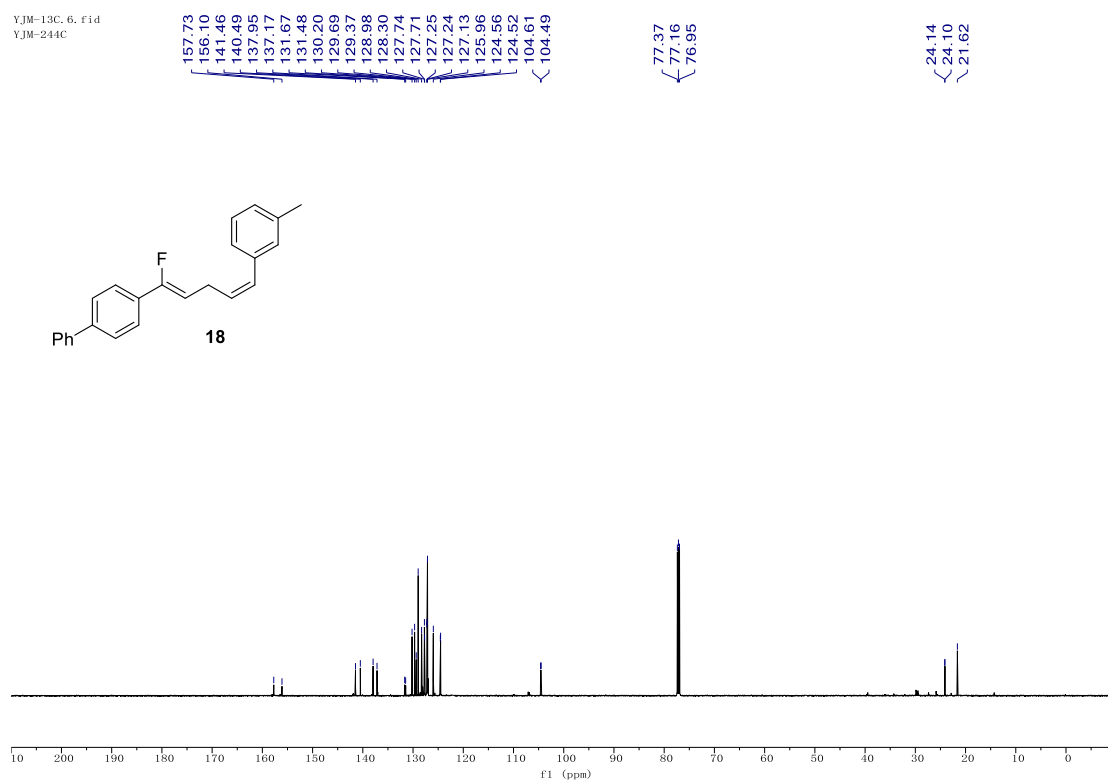

# <sup>19</sup>F NMR (565 MHz, CDCl<sub>3</sub>)

YJM-19F. 9. fid  
YJM-244C

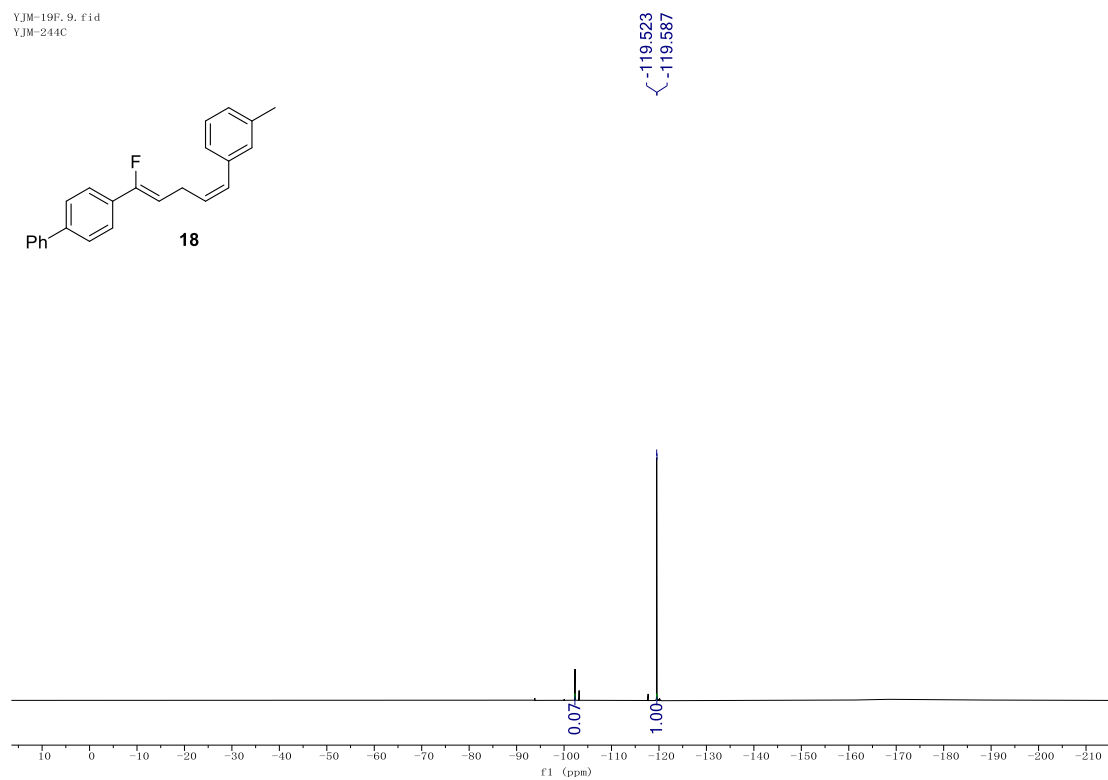

# <sup>1</sup>H NMR (600 MHz, CDCl<sub>3</sub>)

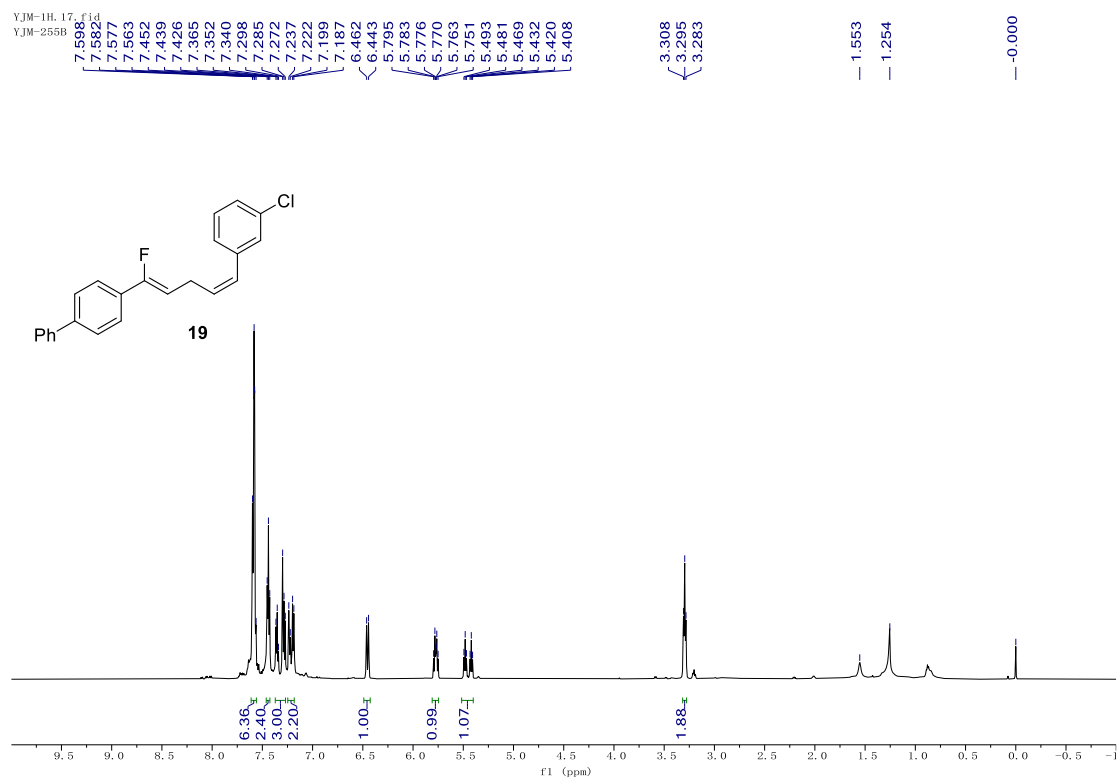

# <sup>13</sup>C NMR (151 MHz, CDCl<sub>3</sub>)

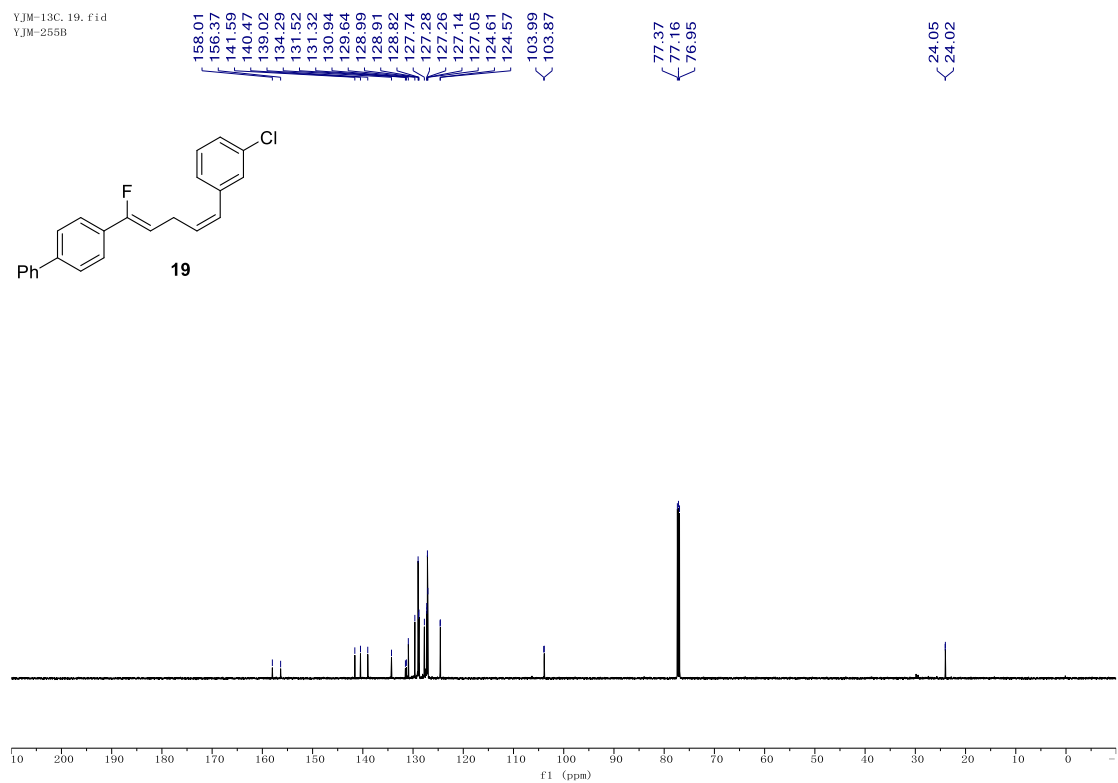

<sup>19</sup>F NMR (565 MHz, CDCl<sub>3</sub>)

YJM-19F, 21, f1d  
YJM-255B

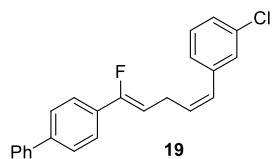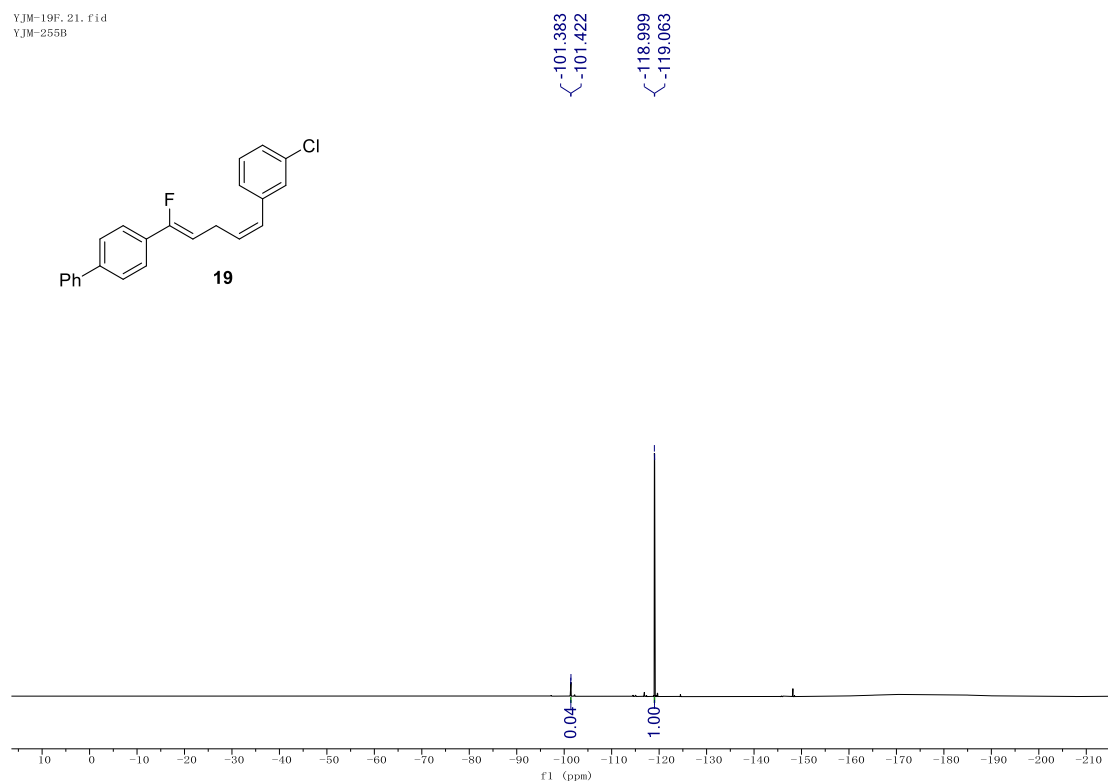

<sup>1</sup>H NMR (600 MHz, CDCl<sub>3</sub>)

YJM-1H, 74, f1d  
YJM-255B

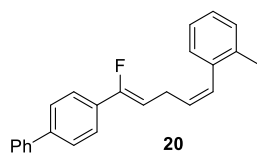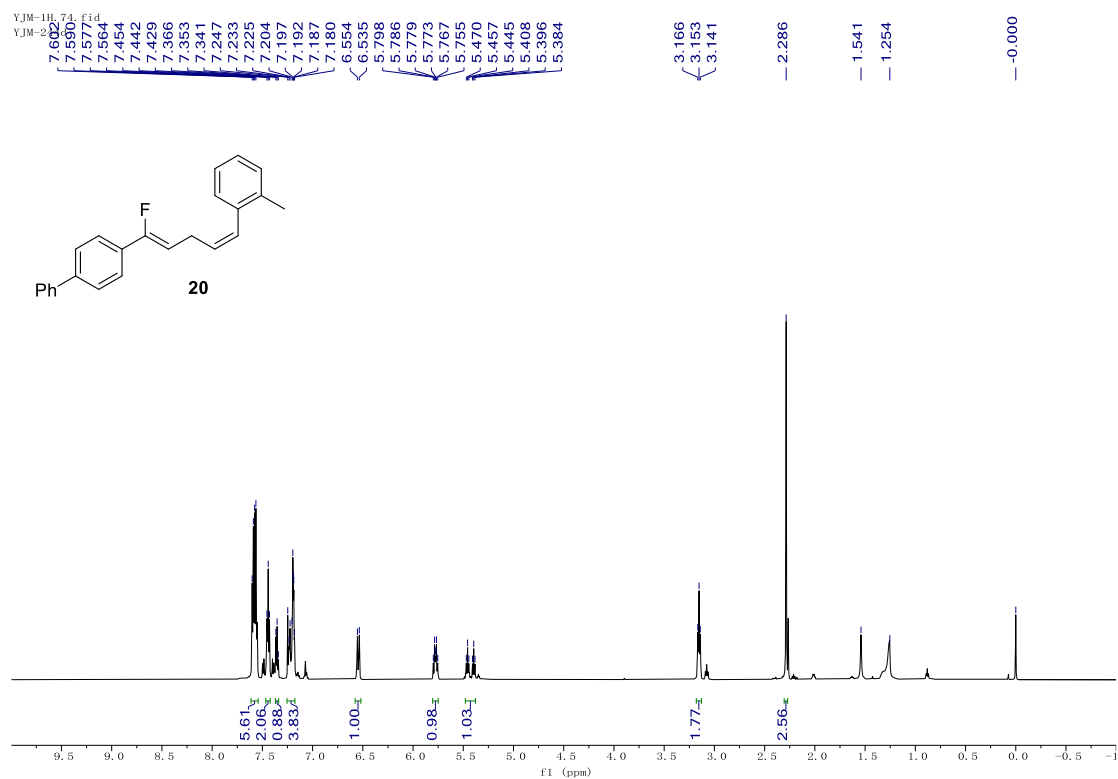

<sup>13</sup>C NMR (151 MHz, CDCl<sub>3</sub>)

YJM-13C. 8. fid  
YJM-244D

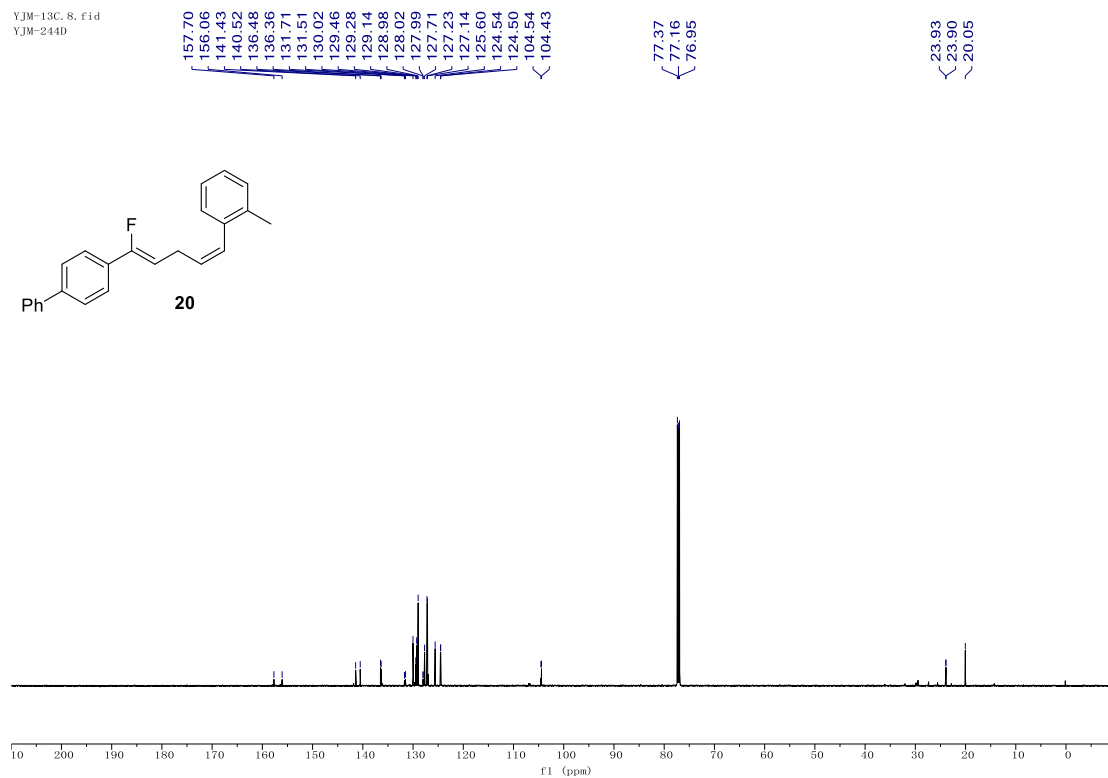

<sup>19</sup>F NMR (565 MHz, CDCl<sub>3</sub>)

YJM-19F. 11. fid  
YJM-244D

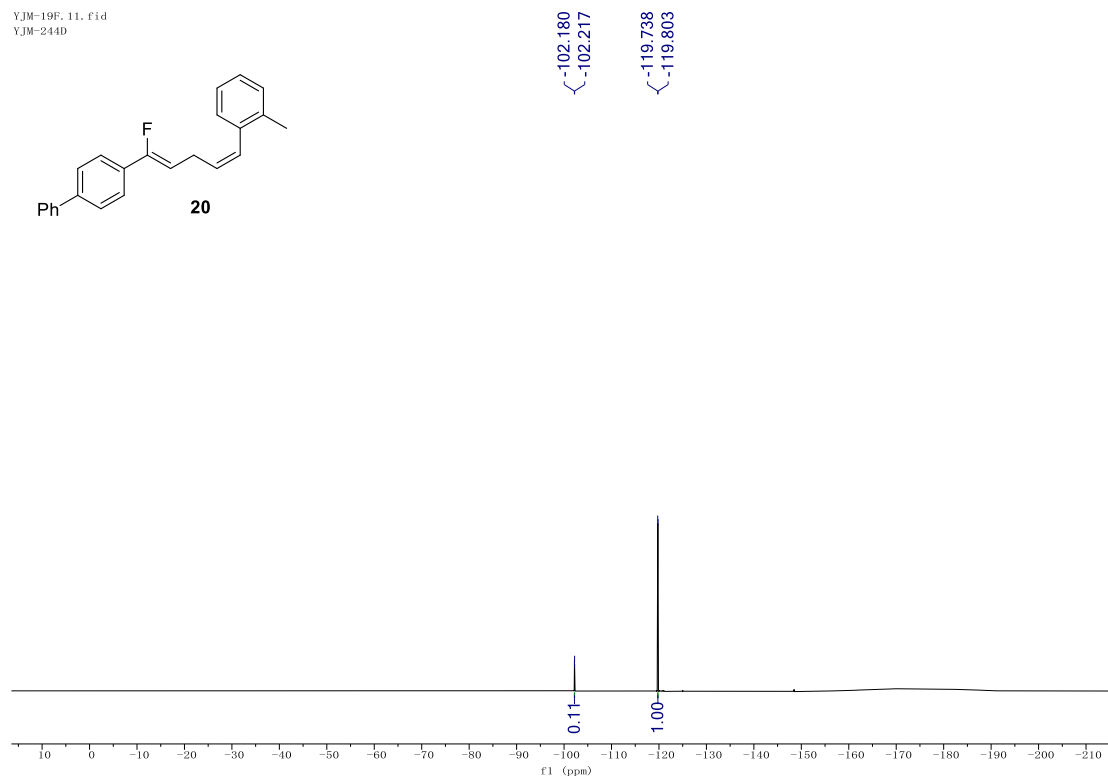

<sup>1</sup>H NMR (600 MHz, CDCl<sub>3</sub>)

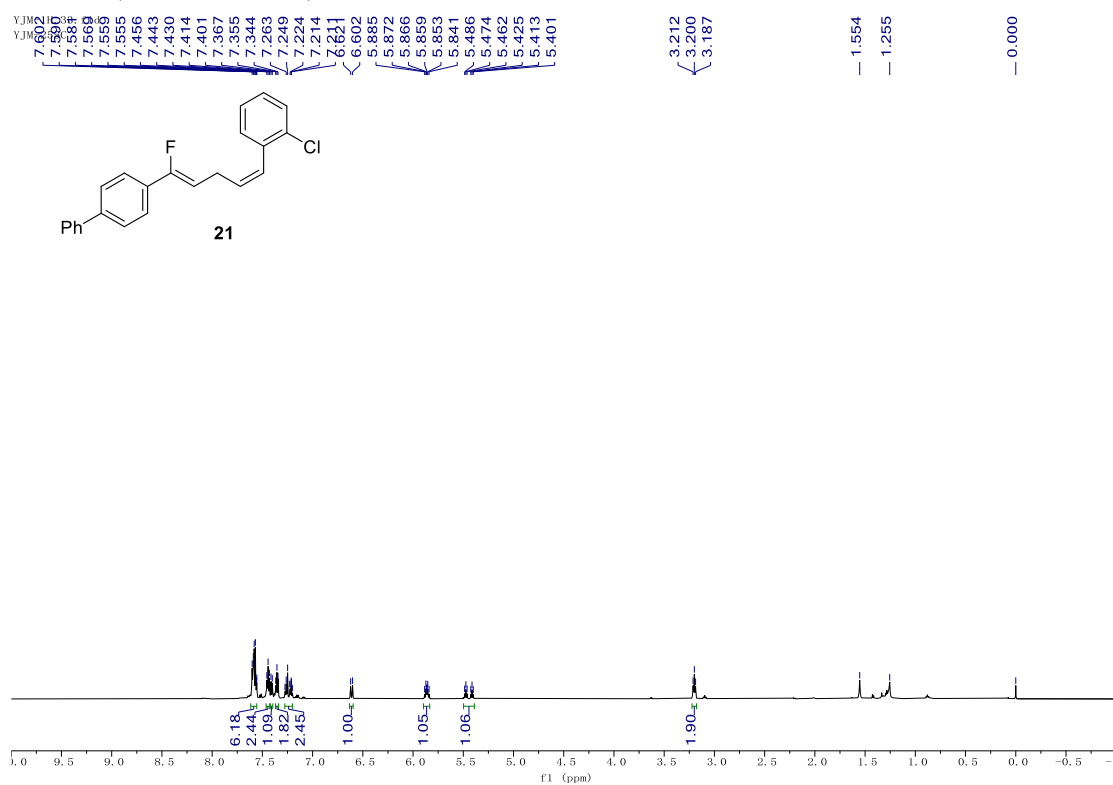

<sup>13</sup>C NMR (151 MHz, CDCl<sub>3</sub>)

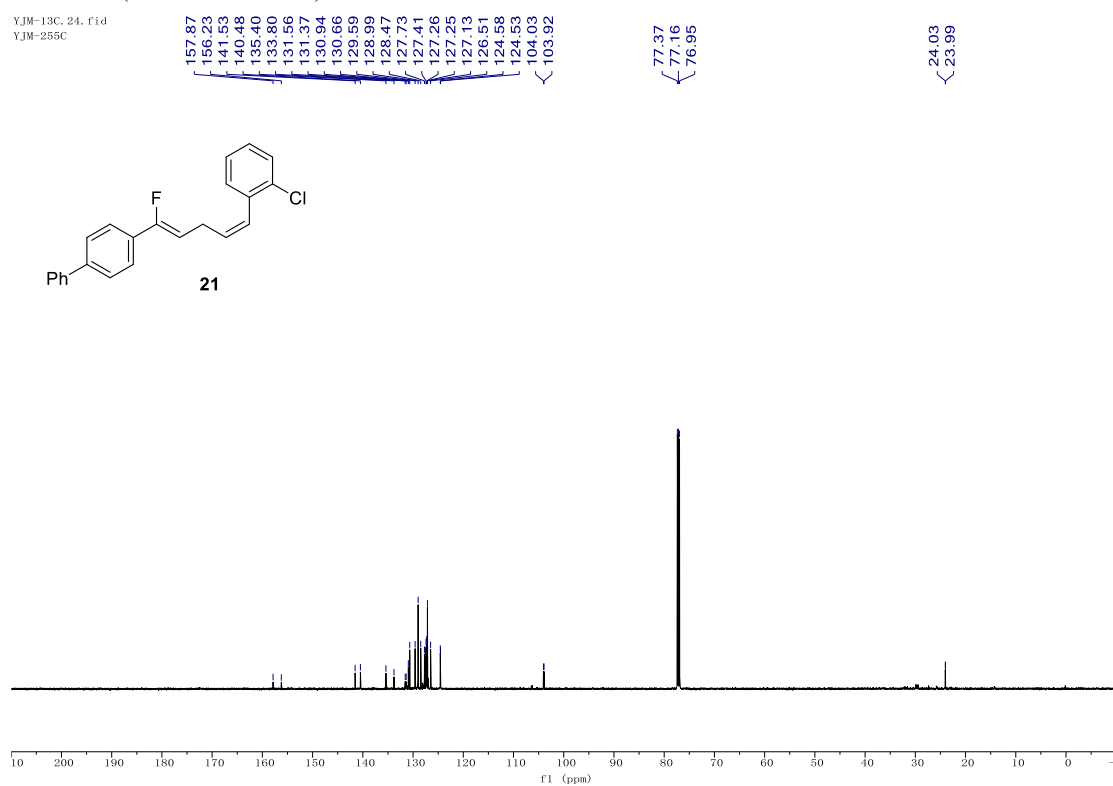

<sup>19</sup>F NMR (565 MHz, CDCl<sub>3</sub>)

YJM-13C, 25, f1d  
YJM-255C -19F

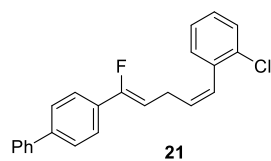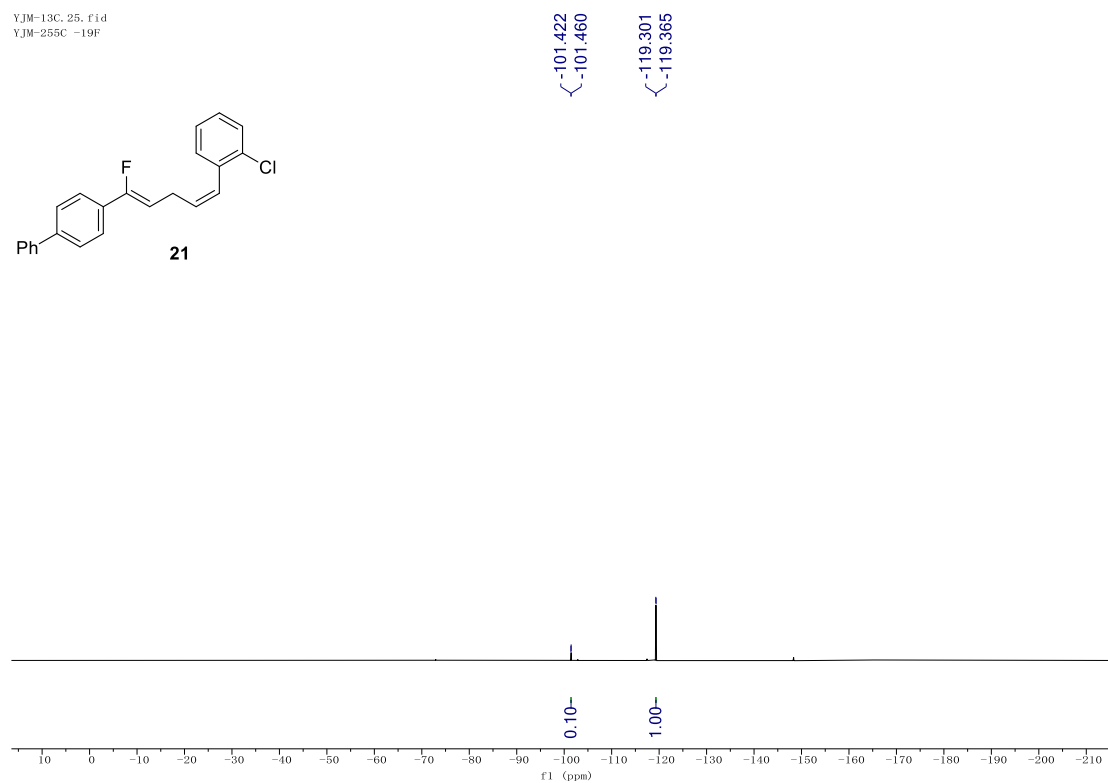

<sup>1</sup>H NMR (600 MHz, CDCl<sub>3</sub>)

YJM-1H, 13, f1d  
YJM-255D

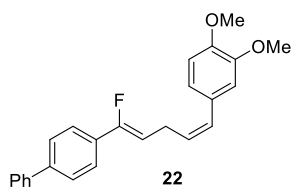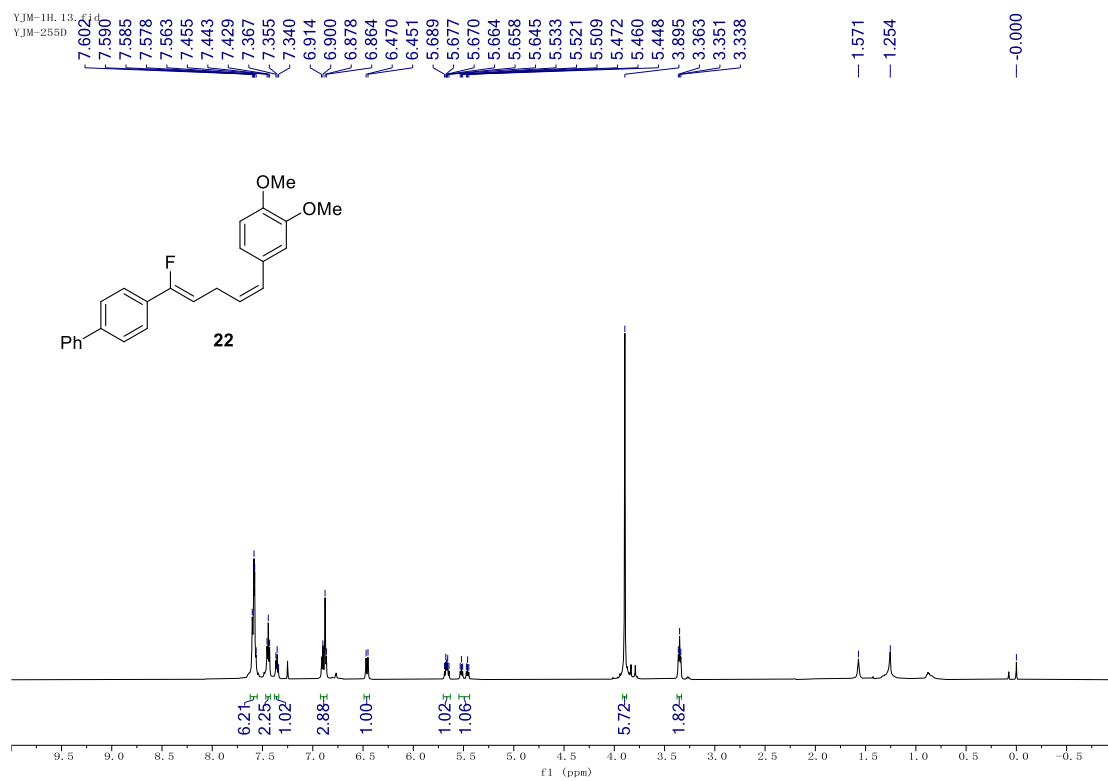



<sup>13</sup>C NMR (151 MHz, CDCl<sub>3</sub>)

YJM-13C\_16.fid  
YJM-255D

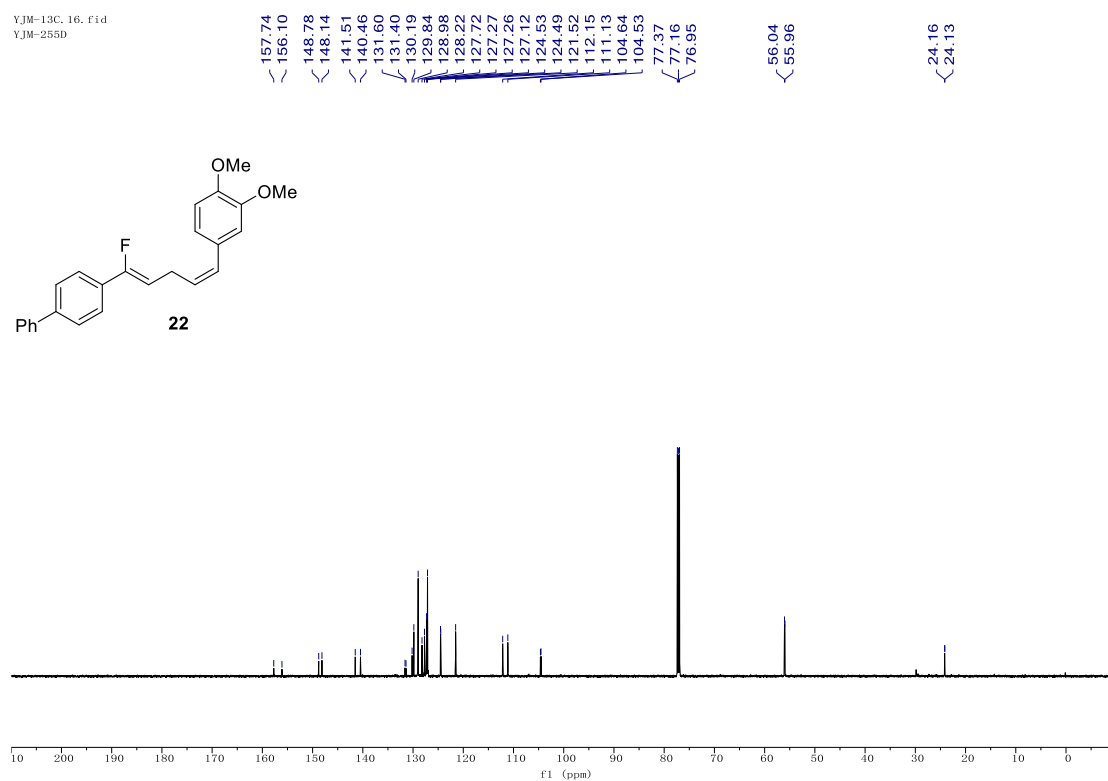

<sup>19</sup>F NMR (565 MHz, CDCl<sub>3</sub>)

YJM-19F\_18.fid  
YJM-255D

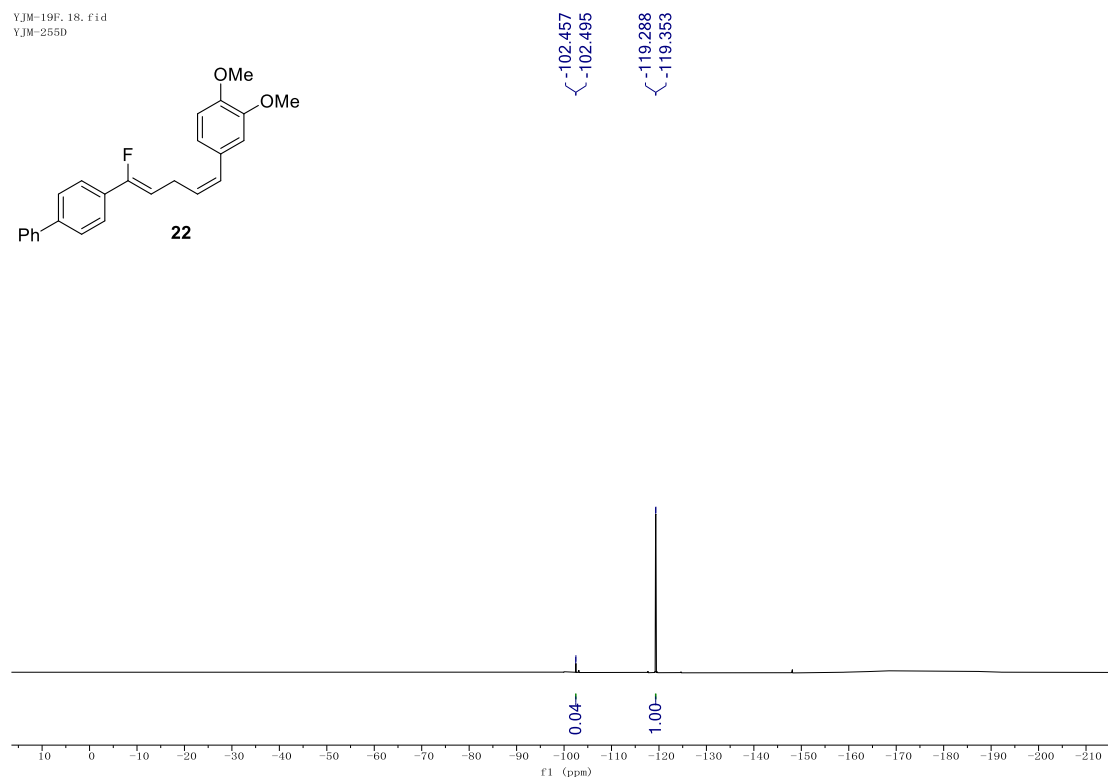

<sup>1</sup>H NMR (600 MHz, CDCl<sub>3</sub>)

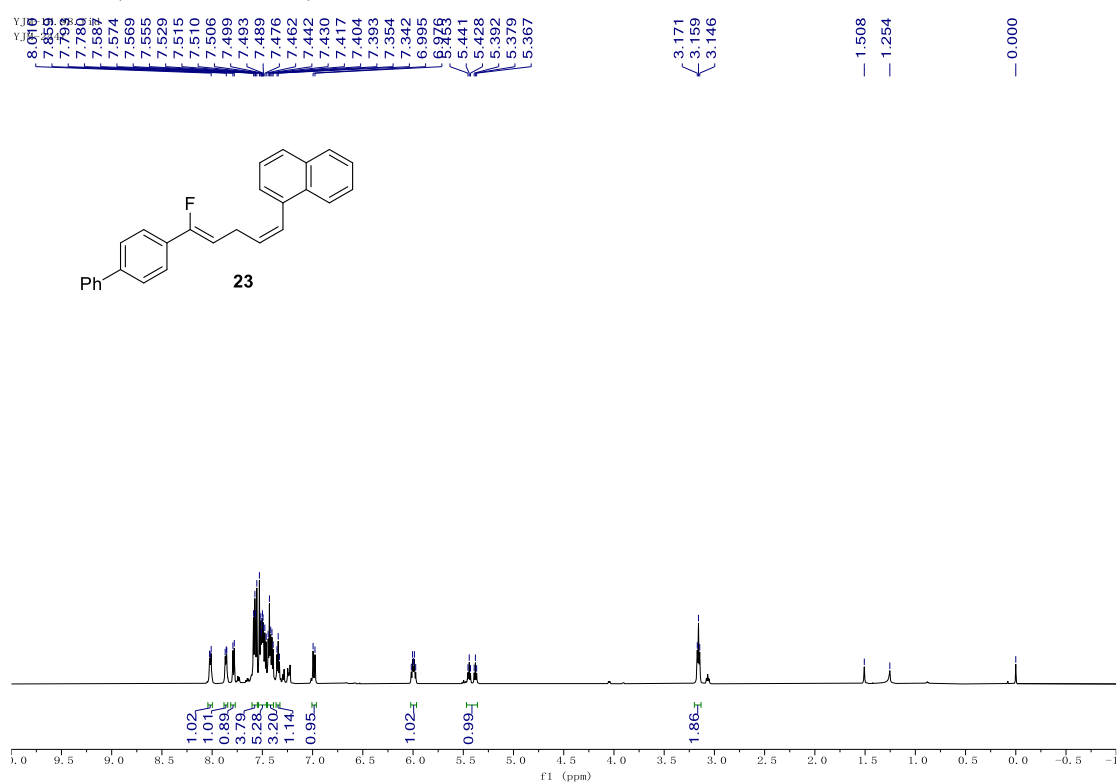

<sup>13</sup>C NMR (151 MHz, CDCl<sub>3</sub>)

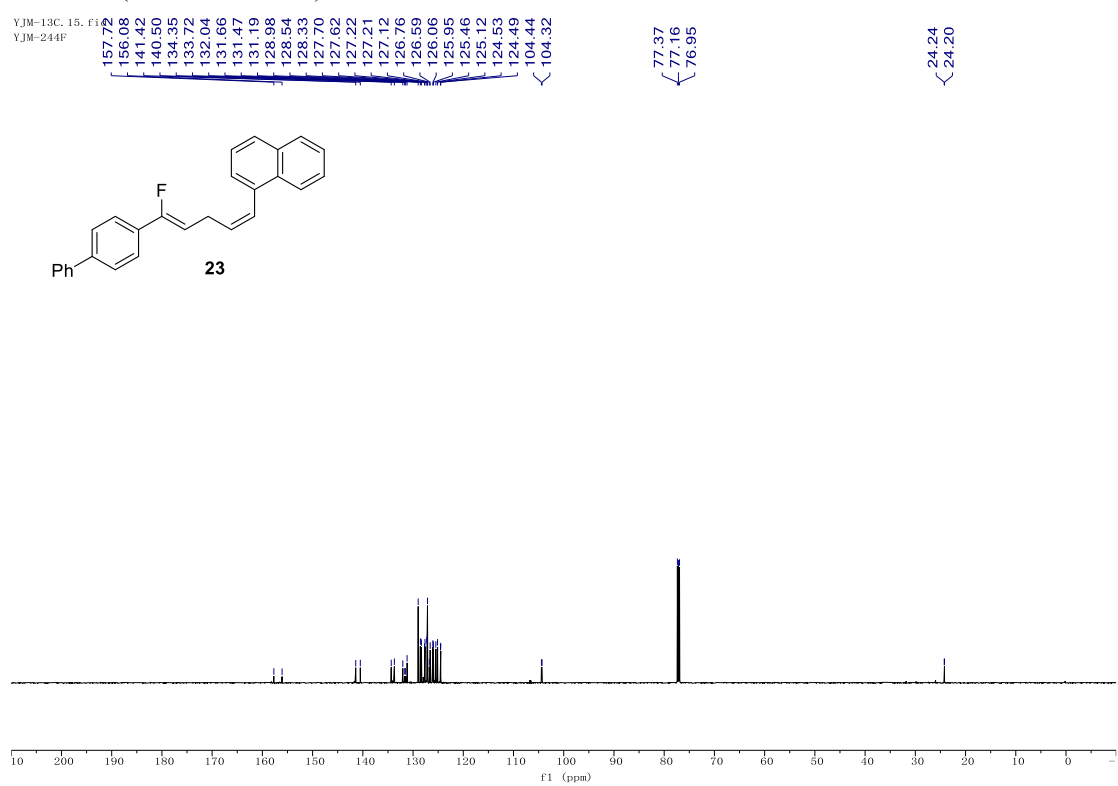

<sup>19</sup>F NMR (565 MHz, CDCl<sub>3</sub>)

YJM-19F\_17.fid  
YJM-244F

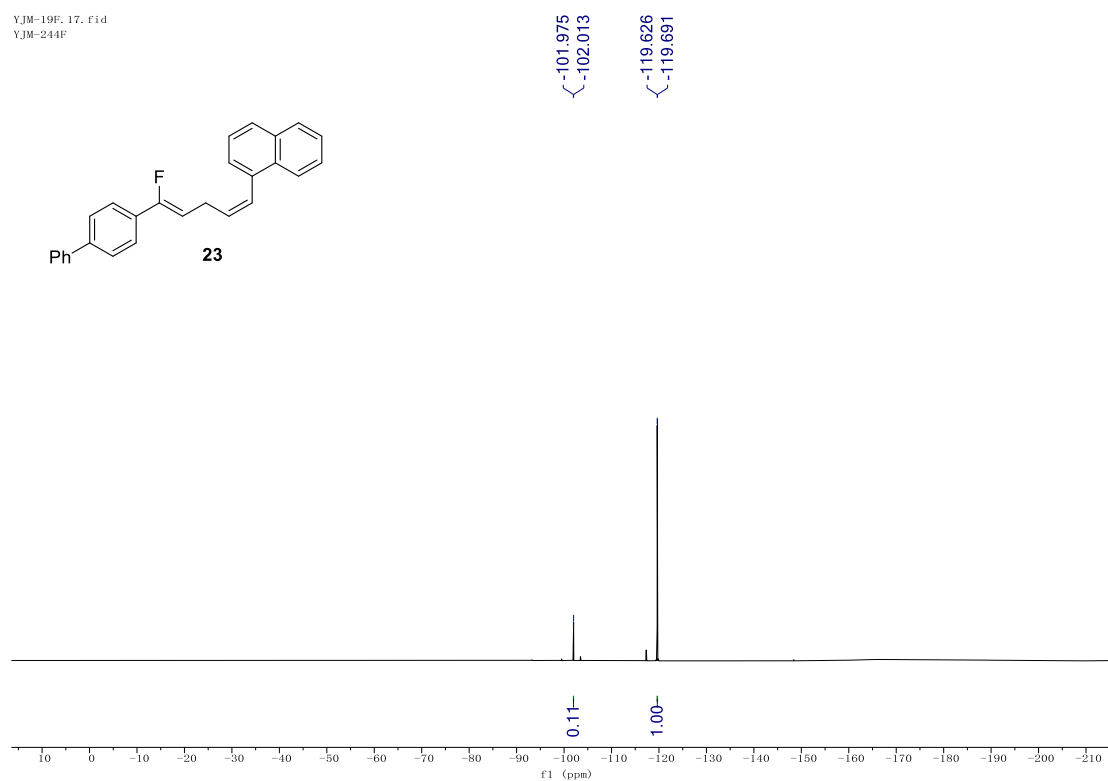

<sup>1</sup>H NMR (600 MHz, CDCl<sub>3</sub>)

YJM-1H\_34.fid  
YJM-2251

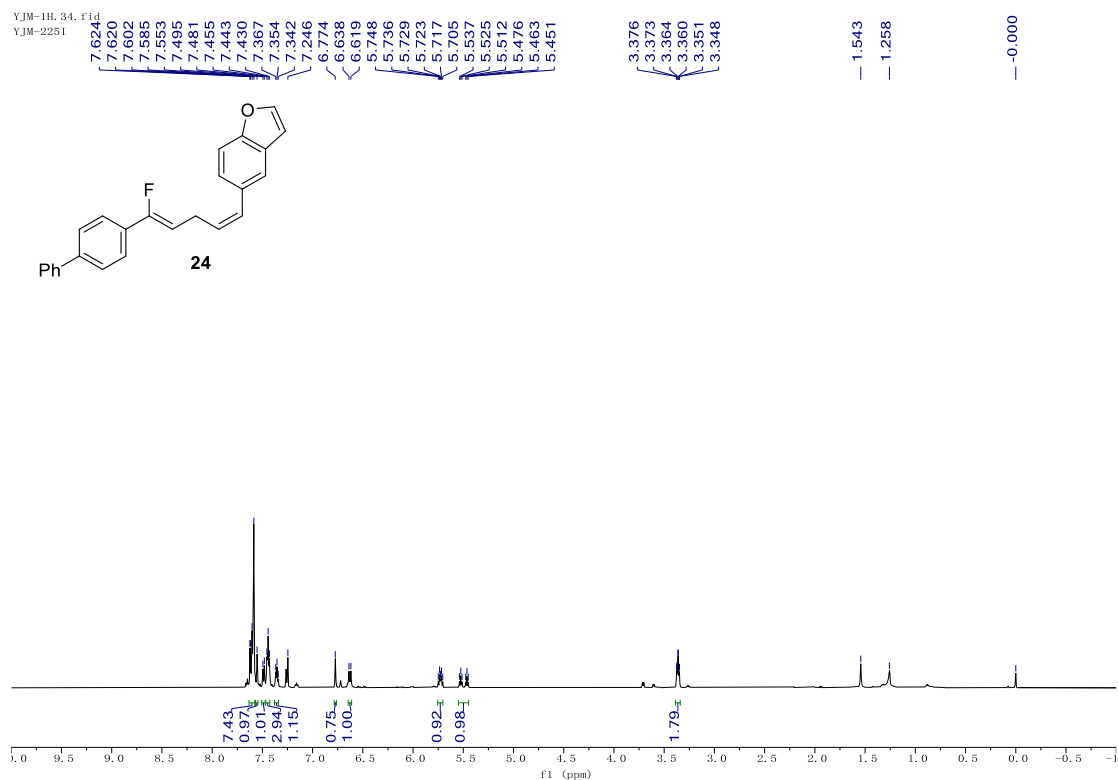

# <sup>13</sup>C NMR (151 MHz, CDCl<sub>3</sub>)

YJM-13C\_22.fid  
YJM-255i

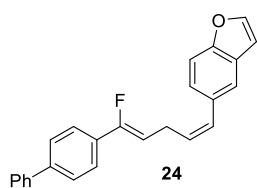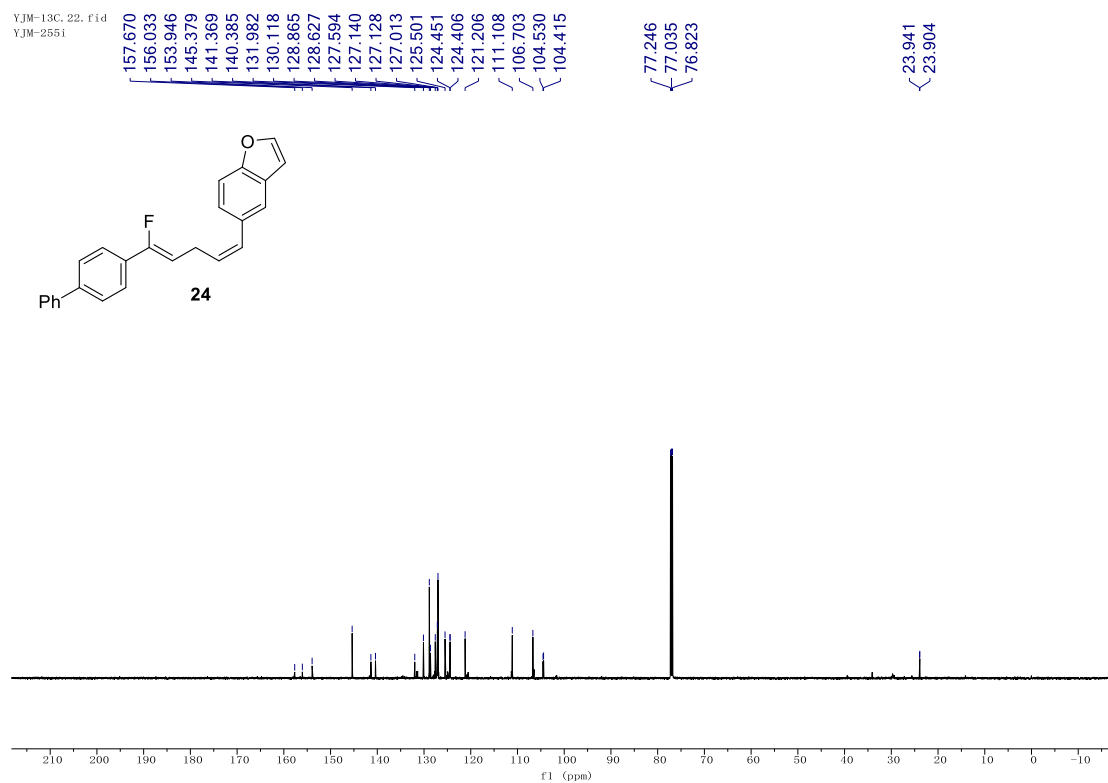

# <sup>19</sup>F NMR (565 MHz, CDCl<sub>3</sub>)

YJM-13C\_23.fid  
YJM-255i (19F no decoupling)

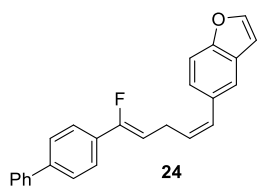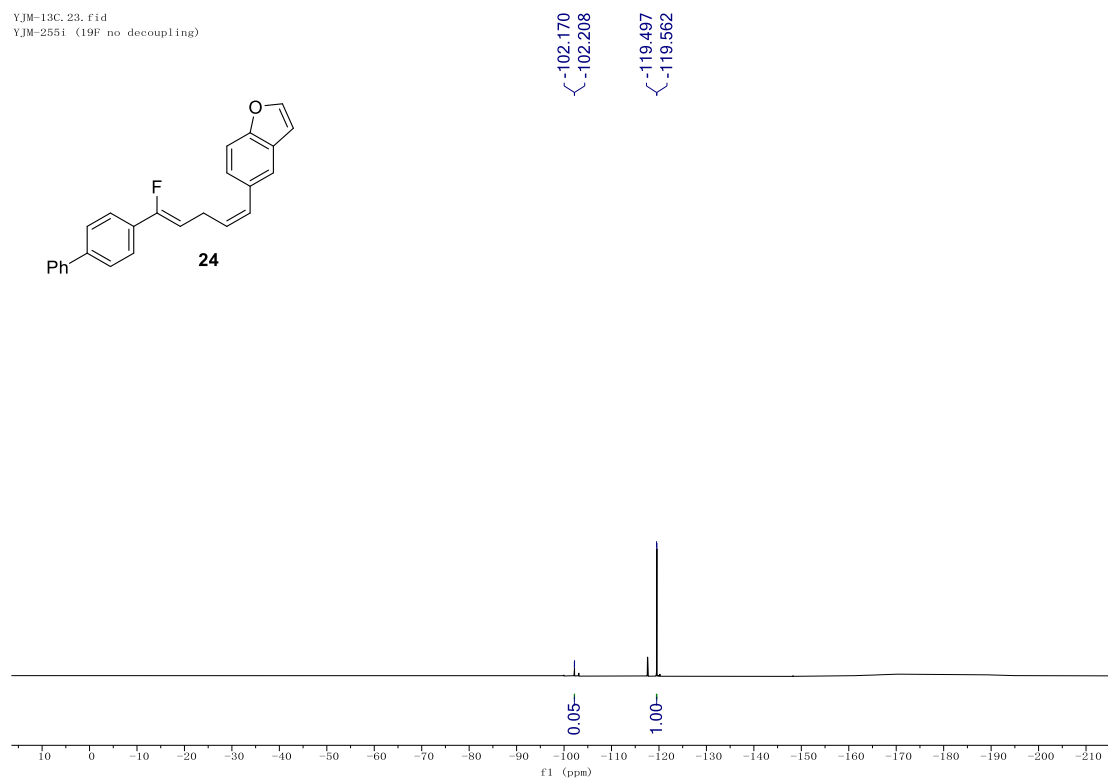

# <sup>1</sup>H NMR (600 MHz, CDCl<sub>3</sub>)

YJM-1H\_36.fid  
YJM-259A

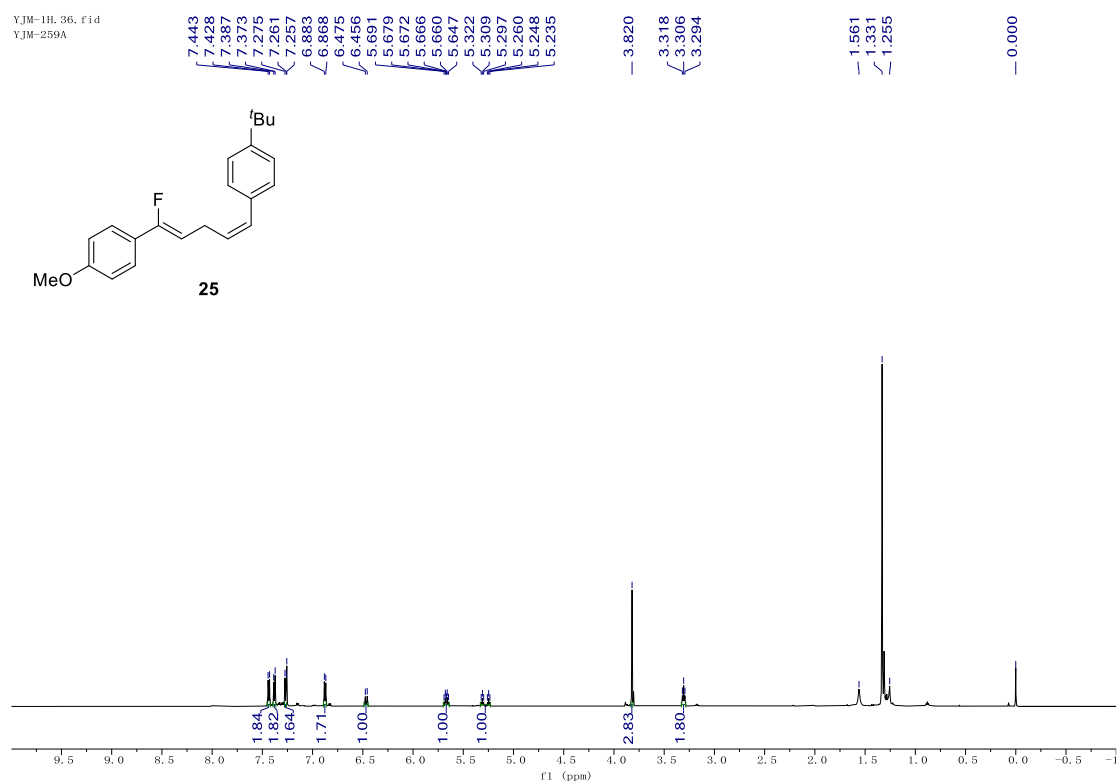

# <sup>13</sup>C NMR (151 MHz, CDCl<sub>3</sub>)

YJM-13C\_27.fid  
YJM-259a

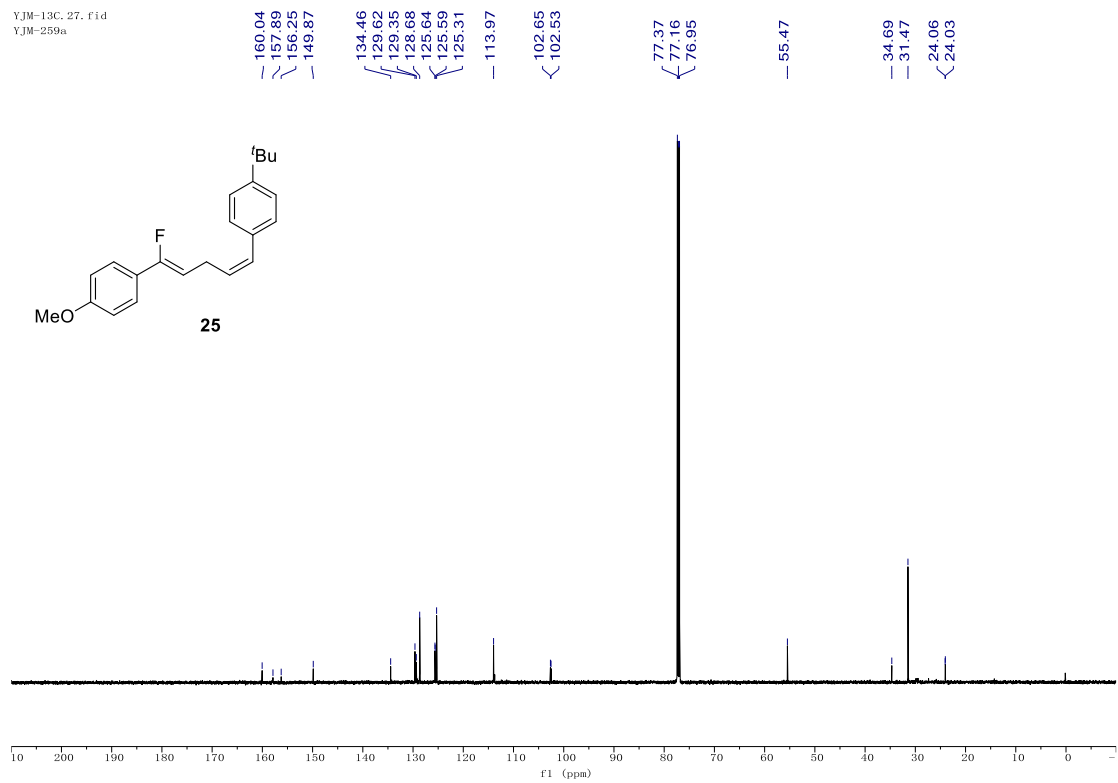

<sup>19</sup>F NMR (565 MHz, CDCl<sub>3</sub>)

YJM-13C, 26, f1d  
YJM-259a (19F, no decoupling)

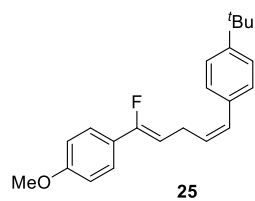

~100.762  
~100.800

~118.595  
~118.661

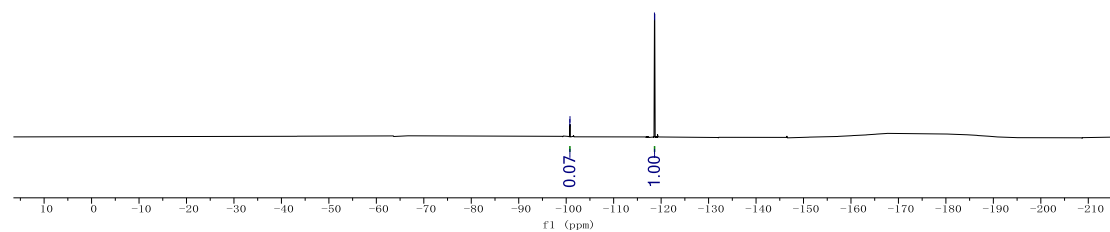

Supplement: d5ob01824b1.pdf [file d5ob01824b1.pdf]
